# Supplementary material for: Efficacy and safety of omalizumab in chronic rhinosinusitis with nasal polyps: a systematic review and meta-analysis of randomised controlled trials
Source: PubMed Central journal article supplement — BMJ Open. 2021 Sep 3;11(9):e047344. doi: 10.1136/bmjopen-2020-047344 (PMC8420736; doi:10.1136/bmjopen-2020-047344), 2021-09-03
Supplement: bmjopen-2020-047344.draft_revisions.pdf [file bmjopen-2020-047344.draft_revisions.pdf]

# BMJ Open

BMJ Open is committed to open peer review. As part of this commitment we make the peer review history of every article we publish publicly available.

When an article is published we post the peer reviewers' comments and the authors' responses online. We also post the versions of the paper that were used during peer review. These are the versions that the peer review comments apply to.

The versions of the paper that follow are the versions that were submitted during the peer review process. They are not the versions of record or the final published versions. They should not be cited or distributed as the published version of this manuscript.

BMJ Open is an open access journal and the full, final, typeset and author-corrected version of record of the manuscript is available on our site with no access controls, subscription charges or pay-per-view fees (<http://bmjopen.bmj.com>).

If you have any questions on BMJ Open's open peer review process please email [info.bmjopen@bmj.com](mailto:info.bmjopen@bmj.com)

# BMJ Open

## **Efficacy and safety of omalizumab in chronic rhinosinusitis with nasal polyps: a systematic review and meta-analysis of randomized controlled trials**

|                               |                                                                                                                                                                                                                                                                                                                                                                                                                                                                                                                                                                                                                                                                                                                                                            |
|-------------------------------|------------------------------------------------------------------------------------------------------------------------------------------------------------------------------------------------------------------------------------------------------------------------------------------------------------------------------------------------------------------------------------------------------------------------------------------------------------------------------------------------------------------------------------------------------------------------------------------------------------------------------------------------------------------------------------------------------------------------------------------------------------|
| Journal:                      | <i>BMJ Open</i>                                                                                                                                                                                                                                                                                                                                                                                                                                                                                                                                                                                                                                                                                                                                            |
| Manuscript ID                 | bmjopen-2020-047344                                                                                                                                                                                                                                                                                                                                                                                                                                                                                                                                                                                                                                                                                                                                        |
| Article Type:                 | Original research                                                                                                                                                                                                                                                                                                                                                                                                                                                                                                                                                                                                                                                                                                                                          |
| Date Submitted by the Author: | 25-Nov-2020                                                                                                                                                                                                                                                                                                                                                                                                                                                                                                                                                                                                                                                                                                                                                |
| Complete List of Authors:     | Wu, Qingwu; Third Affiliated Hospital of Sun Yat-Sen University, Department of Otorhinolaryngology-Head and Neck Surgery<br>Yuan, Lianxiong; Third Affiliated Hospital of Sun Yat-Sen University, Department of Science and Research<br>Qiu, Huijun; Third Affiliated Hospital of Sun Yat-Sen University<br>Wang, Xinyue; Third Affiliated Hospital of Sun Yat-Sen University, Otorhinolaryngology-Head and Neck Surgery<br>Huang, Xue-Kun; Third Affiliated Hospital of Sun Yat-Sen University, Department of Otorhinolaryngology-Head and Neck Surgery<br>Zheng, Rui ; Third Affiliated Hospital of Sun Yat-Sen University<br>Yang, Qintai; Third Affiliated Hospital of Sun Yat-Sen University, Department of Otorhinolaryngology-Head and Neck Surgery |
| Keywords:                     | Adult otolaryngology < OTOLARYNGOLOGY, Endoscopic surgery < OTOLARYNGOLOGY, Adverse events < THERAPEUTICS, Clinical trials < THERAPEUTICS                                                                                                                                                                                                                                                                                                                                                                                                                                                                                                                                                                                                                  |
|                               |                                                                                                                                                                                                                                                                                                                                                                                                                                                                                                                                                                                                                                                                                                                                                            |

SCHOLARONE™  
Manuscripts

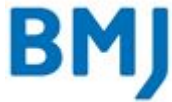

I, the Submitting Author has the right to grant and does grant on behalf of all authors of the Work (as defined in the below author licence), an exclusive licence and/or a non-exclusive licence for contributions from authors who are: i) UK Crown employees; ii) where BMJ has agreed a CC-BY licence shall apply, and/or iii) in accordance with the terms applicable for US Federal Government officers or employees acting as part of their official duties; on a worldwide, perpetual, irrevocable, royalty-free basis to BMJ Publishing Group Ltd ("BMJ") its licensees and where the relevant Journal is co-owned by BMJ to the co-owners of the Journal, to publish the Work in this journal and any other BMJ products and to exploit all rights, as set out in our [licence](#).

The Submitting Author accepts and understands that any supply made under these terms is made by BMJ to the Submitting Author unless you are acting as an employee on behalf of your employer or a postgraduate student of an affiliated institution which is paying any applicable article publishing charge ("APC") for Open Access articles. Where the Submitting Author wishes to make the Work available on an Open Access basis (and intends to pay the relevant APC), the terms of reuse of such Open Access shall be governed by a Creative Commons licence – details of these licences and which [Creative Commons](#) licence will apply to this Work are set out in our licence referred to above.

Other than as permitted in any relevant BMJ Author's Self Archiving Policies, I confirm this Work has not been accepted for publication elsewhere, is not being considered for publication elsewhere and does not duplicate material already published. I confirm all authors consent to publication of this Work and authorise the granting of this licence.

1  
2  
3  
4 **Efficacy and safety of omalizumab in chronic rhinosinusitis with nasal polyps:**  
5  
6 **a systematic review and meta-analysis of randomized controlled trials**  
7  
8

9 Qingwu Wu<sup>1,2\*</sup>, Lianxiong Yuan<sup>3\*</sup>, Huijun Qiu<sup>1\*</sup>, Xinyue Wang<sup>1</sup>, Xuekun  
10  
11 Huang<sup>1</sup>, Rui Zheng<sup>1,2#</sup>, Qintai Yang<sup>1,2#</sup>  
12  
13

14  
15 <sup>1</sup> Department of Otorhinolaryngology-Head and Neck Surgery, The Third Affiliated  
16  
17 Hospital of Sun Yat-Sen University, Guangzhou 510630, China  
18  
19

20  
21 <sup>2</sup> Department of Allergy, The Third Affiliated Hospital of Sun Yat-Sen University,  
22  
23 Guangzhou 510630, China  
24  
25

26  
27 <sup>3</sup> Department of Science and Research, The Third Affiliated Hospital of Sun Yat-Sen  
28  
29 University, Guangzhou 510630, China  
30  
31

32 \*The authors contributed equally to this work.  
33

34 #Corresponding author  
35

36 Rui Zheng, MD and Qintai Yang, MD, PhD  
37  
38

39 Department of Otolaryngology-Head and Neck Surgery  
40  
41

42 The Third Affiliated Hospital of Sun Yat-Sen University  
43  
44

45 No. 600 Tianhe Road, Guangzhou 510630, China  
46  
47

48 Phone: 020-85252239  
49

50 E-mail: rui.zheng@qq.com and yangqint@mail.sysu.edu.cn  
51  
52  
53  
54  
55  
56  
57  
58  
59  
60

## Abstract

### Objectives

To assess the efficacy and safety of omalizumab for chronic rhinosinusitis with nasal polyps (CRSwNP) and to identify evidence gaps that will guide future research on omalizumab for CRSwNP.

### Design

Systematic review and meta-analysis.

### Methods

A comprehensive search was performed in Pubmed, Embase, Web of Science, and the Cochrane Library on 13 October 2020. Two independent authors screened search results, extracted data and appraised studies using the Cochrane risk of bias tool. Only randomized controlled trials (RCTs) assessing omalizumab in adult patients for CRSwNP were included.

### Results

A total of 4 RCTs involving 303 participants were identified. When comparing omalizumab to placebo, there was a significant difference in nasal polyps score (mean difference (MD) = -1.11; 95% confidence interval (CI), -2.09 to -0.13), nasal congestion score (MD = -0.78; 95% CI, -1.25 to -0.30), Sino-Nasal Outcome Test-22 (MD = -15.62; 95% CI, -19.79 to -11.45), Total Nasal Symptom Score (MD = -1.84; 95% CI, -2.43 to -1.25), and reduced need for surgery (risk ratio (RR) = 5.61; 95% CI, 1.99 to 15.81). Furthermore, there was no difference in the risk of serious adverse

1  
2  
3  
4 events ((RR = 1.40; 95% CI, 0.29 to 6.80), adverse events (RR = 0.83; 95% CI, 0.60 to  
5  
6  
7 1.15) and rescue systemic corticosteroid (RR = 0.52; 95% CI, 0.17 to 1.61).

## 9 **Conclusions**

10  
11  
12 This was the first meta-analysis that identified omalizumab significantly improved  
13  
14  
15 endoscopic, clinical, and patient-reported outcomes in adults with moderate to severe  
16  
17  
18 CRSwNP and it was safe and well-tolerated.

## 20 **PROSPERO registration number**

21  
22  
23 CRD42020207639.

24  
25  
26 **Keywords:** omalizumab; anti-IgE antibody; chronic rhinosinusitis; nasal polyps;  
27  
28 systematic review; meta-analysis

## 30 **Strengths and limitation of this study**

- 31  
32  
33  
34 1. Omalizumab, an anti-IgE antibody, is a novel treatment for CRSwNP. However, its  
35  
36  
37 efficacy and safety are not well known.
- 38  
39  
40 2. In this systematic review and meta-analysis, we identified that omalizumab improved  
41  
42  
43 health-related quality of life and reduced the extent of the disease and the need for  
44  
45  
46 surgery in adults with moderate to severe CRSwNP and it was safe.
- 47  
48  
49 3. Studies are required to evaluate their effectiveness in patients with less severe  
50  
51  
52 diseases and their cost in the treatment.
- 53  
54  
55  
56  
57  
58  
59  
60

## Introduction

Chronic rhinosinusitis (CRS) is common and affects up to 5-12% of the general population<sup>1</sup>. It is defined as inflammation of the nose and the paranasal sinuses characterized by nasal congestion, nasal discharge, facial pressure, and loss of smell. CRS with nasal polyps (CRSwNP) is a severe form of CRS and accounts for 18% of patients with CRS<sup>2</sup>. CRSwNP is associated with adult-onset asthma, decreased health-related quality of life (HRQoL)<sup>3, 4</sup>, and substantial economic burden<sup>5</sup>. Many patients with CRSwNP often fail to achieve sufficient benefit from intranasal corticosteroids (INCS) or systemic corticosteroids (SCS) and/ or functional endoscopic sinus surgery (FESS)<sup>6</sup>. Although FESS may be successful initially, relapse occurs in 20% of patients after 12 months<sup>7</sup>, in 40% after 18 months<sup>8</sup>, and in 80% after 12 years despite ongoing INCS therapy<sup>9</sup>. Therefore, novel treatments such as biologics are needed for CRSwNP. Omalizumab (anti-IgE antibody) is one of the biologics and may help patients with severe CRSwNP. It was reported that omalizumab made their symptom better and shrank their polyps in small-size randomized controlled trials (RCTs)<sup>10, 11</sup>. But some of its effectiveness and safety are not well known. Thus, some systematic reviews were conducted to assess the effectiveness and safety of it. But they found very little information or insufficient evidence about the use of omalizumab and cannot determine whether it was effective or not<sup>12, 13</sup>. Currently, some well-designed RCTs about omalizumab for CRSwNP were published<sup>14</sup>, which may provide us with some evidence. Therefore, this systematic review was conducted to evaluate the efficacy and safety of

1  
2  
3  
4 omalizumab versus placebo in adult patients with CRSwNP, and identify evidence gaps  
5  
6  
7 that will guide future research on omalizumab for CRSwNP.  
8  
9

## 10 **Methods**

11  
12 We performed a systematic review based on a priori protocol that was registered with  
13  
14 PROSPERO (No. CRD42020207639)<sup>15</sup>. This review was reported according to the  
15  
16 Preferred Reporting Items for Systematic reviews and Meta-Analyses (PRISMA)  
17  
18 statement<sup>16</sup> (Additional file 1).  
19  
20  
21  
22

## 23 **Eligibility criteria**

24  
25 (a) Population: adult patients (>18) with CRSwNP; (b) Intervention and comparison:  
26  
27 studies comparing omalizumab with placebo, given for at least 16 weeks; (c) Study  
28  
29 design: randomized controlled trials (RCTs); (d) Studies written and published in the  
30  
31 English language were included.  
32  
33  
34  
35

## 36 **Search strategy and selection process**

37  
38 A comprehensive search was performed in Pubmed, Embase, Web of Science, and the  
39  
40 Cochrane Library on 13 October 2020. We used the following combined text and  
41  
42 MeSH terms: “nasal polyps”, “sinusitis” and “omalizumab”. Search strategies for major  
43  
44 databases are provided in Appendix 1.  
45  
46  
47  
48

49  
50 Titles and abstracts of the retrieved articles were then screened for their potential  
51  
52 relevance by two reviewers (Q.W Wu and L.X Yuan ). The full-text articles were  
53  
54 obtained and assessed by the same reviewers to determine whether they met the  
55  
56 inclusion criteria for this review. We resolved any differences by a discussion with a  
57  
58  
59  
60



1  
2  
3  
4 third author (Q.T Yang).  
5

### 6 7 **Data extraction**

8  
9 Two reviewers (H.J Qiu and X.Y Wang) read full-text articles and extracted data using  
10  
11 a pre-defined extraction form. Data were extracted on the following: first author, year  
12  
13 of publication, patient characteristics, study methods, and outcome data.  
14  
15  
16

### 17 18 **Assessment of risk of bias**

19  
20 In this review, the original version of the Cochrane 'Risk of bias' tool was used to assess  
21  
22 the risk of bias in included studies. The risk of bias was assessed as 'low', 'high' or  
23  
24 'unclear' for each of the following six domains: sequence generation; allocation  
25  
26 concealment; blinding of participants, personnel and outcome assessment; incomplete  
27  
28 outcome data; selective reporting; other sources of bias (if required).  
29  
30  
31  
32

### 33 34 **Statistical analysis**

35  
36 Study characteristics were shown in tables and described narratively. All meta-analyses  
37  
38 were conducted by Review Manager (version 5.3). For dichotomous data, we planned  
39  
40 to analyze treatment differences as a risk ratio (RR) calculated using the Mantel-  
41  
42 Haenszel methods. For continuous outcomes, we planned to express treatment effects  
43  
44 as a mean difference (MD) with standard deviation (SD) or as a standardized mean  
45  
46 difference (SMD) if different scales had been used to measure the same outcome.  
47  
48  
49  
50  
51  
52 Statistical heterogeneity was assessed by the Chi<sup>2</sup> test (with a significance level set at  
53  
54 P value < 0.10) and the I<sup>2</sup> statistic. A random-effects model was used in the analysis if  
55  
56 it was likely heterogeneity. The possibility of publication bias was assessed by  
57  
58  
59  
60

1  
2  
3  
4 constructing a funnel plot if sufficient studies ( $> 10$ ) were available for an outcome.  
5  
6

## 7 **Results**

### 8 **Study selection**

9  
10 We identified 1966 articles, of which 3 (with data for 302 participants) were included  
11  
12 in our analysis (Figure 1). The 3 articles (Pinto 2010<sup>10</sup>, Gevaert 2013<sup>11</sup>, and Gavaert  
13  
14 2020<sup>14</sup>) were published between 2010 and 2020, of which Gavaert 2020 reported 2  
15  
16 RCTs (POLYP1 2020 and POLYP2 2020).  
17  
18  
19  
20  
21  
22

### 23 **Study characteristics**

24  
25 A summary of key participant characteristics, interventions, and comparison pairs was  
26  
27 shown in Table 1. Except for 2 participants in Pinto 2010, all the participants were  
28  
29 adults with CRSwNP. All the studies were double-blind RCTs and used a placebo.  
30  
31  
32  
33  
34 Study duration ranged from 20 weeks to 26 weeks.  
35  
36

### 37 **Risk of bias and quality of the clinical trials**

38  
39 There were 4 RCTs included in this review. Overall the risk of bias was low, except the  
40  
41 random sequence generation of Pinto 2010 was unclear. Our judgments about each risk  
42  
43 of bias item presented as percentages across all included studies were shown in Figure  
44  
45  
46  
47 2. Our judgments about each risk of bias item for each included study were shown in  
48  
49  
50  
51 Figure 3.  
52

### 53 **Primary outcomes**

54  
55 The mean difference (MD) in the change of nasal polyps score (NPS) was -1.11 (95%  
56  
57 confidence interval (CI), -2.09 to -0.13; 4 RCTs; 302 participants;  $I^2 = 90\%$ ; Figure  
58  
59  
60

1  
2  
3  
4 4A). We noted the high  $I^2$  value and Pinto 2020 had no significant reduction in NPS.  
5  
6  
7 However, the removal of Pinto 2020 did not change the overall effect size in sensitivity  
8  
9  
10 analyses. Therefore, we considered the certainty of the evidence to be high despite the  
11  
12 large  $I^2$  value.

13  
14  
15 The pooled mean difference of nasal congestion score (NCS ) is -0.78 favoring the  
16  
17 groups receiving omalizumab (95% CI, -1.25 to -0.30; 3 RCTs; 288 participants;  $I^2 =$   
18  
19 82%; Figure 4B). Although the heterogeneity was high in this analysis, all 3 RCTs  
20  
21 showed a significant reduction in NCS with omalizumab.  
22  
23

24  
25  
26 The Sino-Nasal Outcome Test-22 (SNOT-22) score was 15.62 points lower in  
27  
28 participants who received omalizumab (MD = -15.62; 95% CI, -19.79 to -11.45; 265  
29  
30 participants;  $I^2 = 0%$ ; Figure 4C). Because the different measuring tools (Pinto 2010,  
31  
32 SNOT-20; Gevaert 2013, Short-Form Health Questionnaire (SF-36)) and unavailable  
33  
34 data , these 2 RCTs were excluded in this pooled analysis.  
35  
36  
37

### 38 39 **Secondary outcomes**

40  
41  
42 The mean difference in the change of Total Nasal Symptom Score (TNSS) was 1.84  
43  
44 points lower in omalizumab group (MD = -1.84; 95% CI, -2.43 to -1.25; 3 RCTs; 279  
45  
46 participants;  $I^2 = 0%$ ; Figure 4D).  
47  
48

49  
50 No serious adverse events (SAEs) were reported in Gevaert 2013 and Pinto 2010.  
51  
52  
53 However, POLYP1 2020 reported 1 case in the placebo group with myocardial  
54  
55 infarction and POLYP2 2020 reported 1 case of pneumonia in the placebo group and 3  
56  
57 cases in the omalizumab group (1 snake bite, 1 hand fracture, and 1 asthma  
58  
59  
60

1  
2  
3  
4 exacerbation). The pooled result indicated that there was no difference in the risk of  
5  
6 SAEs (risk ratio (RR) = 1.40; 95% CI, 0.29 to 6.80; 4 RCTs; 302 participants;  $I^2 = 28\%$ ;  
7  
8 Figure 4E).

9  
10  
11  
12 There was no difference in the risk of adverse events (AEs) (RR = 0.83; 95% CI, 0.60  
13  
14 to 1.15; 4 RCTs; 302 participants;  $I^2 = 0\%$ ; Figure 4F). It was uncertain where or not  
15  
16 there was a difference in the risk of rescue systemic corticosteroid (RSCS; RR = 0.52;  
17  
18 95% CI, 0.17 to 1.61; 3 RCTs; 279 participants;  $I^2 = 0\%$ ; Figure 4G). POLYP1 2020  
19  
20 and POLYP2 2020 reported the number of reduced need for surgery (RNS). The  
21  
22 proportion was higher in the group that received omalizumab (RR = 5.61; 95% CI, 1.99  
23  
24 to 15.81; 2 RCTs; 265 participants;  $I^2 = 0\%$ ; Figure 4H).

## 31 Discussion

### 33 Principal findings

34  
35 This systematic review and meta-analysis identified 4 RCTs with 302 participants  
36  
37 evaluating the efficacy and safety of omalizumab in CRSwNP. It showed that  
38  
39 omalizumab significantly improved the size of nasal polyps (measured by NPS),  
40  
41 symptoms (measured by NCS and TNSS), and Health-related quality of life (HRQoL;  
42  
43 measured by SNOT-22), and reduce the need for surgery (measured by RNS). What's  
44  
45 more, there was no difference in the risk of SAEs, AEs, and RSCS.

### 53 Comparison with other studies

54  
55 Hong included two studies (Gavaert 2013 and Pinto 2010) and made a narrative  
56  
57 systematic review<sup>12</sup>. They concluded that there was insufficient evidence to determine  
58  
59  
60

1  
2  
3  
4 the effectiveness of omalizumab for CRS. In Chong's systematic review and meta-  
5  
6 analysis, there were 3 small studies with 65 participants (Gavaert 2013, Pinto 2010, and  
7  
8 NCT01066104) evaluated omalizumab<sup>13</sup>. Their results also showed that there were very  
9  
10 uncertain about the effect of omalizumab on disease-specific HRQoL, severe adverse  
11  
12 events, the extent of disease (CT scan scores), generic HRQoL, and adverse effects.  
13  
14  
15 NCT01066104<sup>17</sup> included in Chong's review was unpublished data, so it was excluded  
16  
17  
18 in our study according to our inclusion criteria.  
19  
20  
21

### 22 23 **Implication for future research and clinical practice**

24  
25 Patients with CRSwNP and comorbid asthma often have a high symptom burden,  
26  
27 substantial impact on HRQoL, and a higher risk of RSCS and revision surgery<sup>1</sup>. There  
28  
29 were 4 RCTs included in this systematic review, which recruited patients with moderate  
30  
31 to severe CRSwNP. The patients in omalizumab group experienced significant  
32  
33 improvements in HRQoL, and reduced disease severity and need for surgery.  
34  
35 Furthermore, there was no increased risk of SAEs and AEs in patients treated with  
36  
37 omalizumab. Thus, it was certain that omalizumab significantly improved endoscopic,  
38  
39 clinical, and patient-reported outcomes in moderate to severe CRSwNP and it was well  
40  
41 tolerated.  
42  
43  
44  
45  
46  
47  
48

49  
50 However, it is still unknown that omalizumab is effective in patients with less severe  
51  
52 disease and more affordable compared to conventional treatment with topical and  
53  
54 systemic corticosteroids and surgery. Therefore, studies are required to evaluate their  
55  
56 effectiveness in patients with less severe diseases and their cost in the treatment. In  
57  
58  
59  
60

1  
2  
3  
4 addition, long-term observational studies are also required to determine if omalizumab  
5  
6  
7 lose its effectiveness over time, or whether there are any late adverse events.  
8

### 9 **Limitations of the study**

10  
11  
12 Despite the strict methodology of this systematic review and meta-analysis using  
13  
14 PRIMSA guidelines, certain limitations should be considered. First, studies recruited  
15  
16 participants with moderate to severe CRSwNP, as half of participants also had asthma  
17  
18 as comorbidity or inhaled asthma therapy. Therefore, there is no evidence on whether  
19  
20 or not patients with less severe disease (without asthma) would benefit. Secondly, 4  
21  
22 RCTs were all in adults and no available data for children. Thirdly, because the longest  
23  
24 follow-up of 4 RCTs was only up to 26 weeks, there were too short to comprehensively  
25  
26 and adequately assess the risks of side effect, RSCS, and RNS. Finally, there were only  
27  
28 4 RCTs (<10), so a possibility of publication bias was not assessed by constructing a  
29  
30 funnel plot in this systematic review<sup>18</sup>.  
31  
32  
33  
34  
35  
36  
37  
38

### 39 **Conclusions**

40  
41  
42 To the best of our knowledge, this was the first meta-analysis that identified  
43  
44 omalizumab significantly improved endoscopic, clinical, and patient-reported  
45  
46 outcomes in moderate to severe CRSwNP and it was safe and well-tolerated. Studies  
47  
48 are required to evaluate their effectiveness in patients with less severe diseases and their  
49  
50 cost in the treatment.  
51  
52  
53

### 54 **Acknowledgements**

55  
56  
57  
58  
59  
60 N/A.

## Contributors

Concept and design: R Zheng and Q.T Yang. Acquisition, analysis, or interpretation of data: Q.W Wu, L.X Yuan, Q.H Qiu, X.Y Wang, and X.K Huang. Drafting of the manuscript: QW Wu and L.X Yuan. Critical revision of the manuscript for important intellectual content: R Zheng and Q.T Yang. Statistical analysis: L.X Yuan. Supervision: R Zheng and Q.T Yang.

## Funding

This work was supported by the National Natural Science Foundation of China (No. 81670912 and 81870704), Sun Yat-sen University Clinical Research 5010 Program (No. 2019006), the China Postdoctoral Science Foundation Grant (2019M653207), Guangdong Basic and Applied Basic Research Foundation (2020A1515010133), and the Medical Scientific Research Foundation of Guangdong Province of China (A2019037).

## Competing interests

No potential conflict of interest was reported by the authors.

## Patient consent for publication

Not required.

## Provenance and peer review

1  
2  
3  
4 Not commissioned; externally peer reviewed.  
5  
6

7  
8 **Data availability statement**  
9

10  
11 All data relevant to the study are included in the article or uploaded as supplementary  
12  
13 information.  
14  
15

16  
17 **ORCID**  
18

19  
20  
21 Qingwu Wu, <https://orcid.org/0000-0003-0943-2558>.  
22

23  
24 Qintai Yang, <https://orcid.org/0000-0003-3377-737X>.  
25  
26  
27  
28  
29  
30  
31  
32  
33  
34  
35  
36  
37  
38  
39  
40  
41  
42  
43  
44  
45  
46  
47  
48  
49  
50  
51  
52  
53  
54  
55  
56  
57  
58  
59  
60



## References

1. Fokkens WJ, Lund VJ, Hopkins C, et al. European Position Paper on Rhinosinusitis and Nasal Polyps 2020. *Rhinology* 2020; 58. DOI: 10.4193/Rhin20.600.
2. Benjamin MR, Stevens WW, Li N, et al. Clinical Characteristics of Patients with Chronic Rhinosinusitis without Nasal Polyps in an Academic Setting. *J Allergy Clin Immunol Pract* 2019; 7: 1010-1016. DOI: 10.1016/j.jaip.2018.10.014.
3. Bachert C, Zhang L and Gevaert P. Current and future treatment options for adult chronic rhinosinusitis: Focus on nasal polyposis. *The Journal of allergy and clinical immunology* 2015; 136: 1431-1440. DOI: 10.1016/j.jaci.2015.10.010.
4. Khan A, Huynh TMT, Vandeplas G, et al. The GALEN rhinosinusitis cohort: chronic rhinosinusitis with nasal polyps affects health-related quality of life. *Rhinology* 2019; 57: 343-351. DOI: 10.4193/Rhin19.158.
5. Rudmik L. Economics of Chronic Rhinosinusitis. *Curr Allergy Asthma Rep* 2017; 17: 20. DOI: 10.1007/s11882-017-0690-5.
6. Stevens WW, Schleimer RP and Kern RC. Chronic Rhinosinusitis with Nasal Polyps. *J Allergy Clin Immunol Pract* 2016; 4: 565-572. DOI: 10.1016/j.jaip.2016.04.012.
7. Tokunaga T, Sakashita M, Haruna T, et al. Novel scoring system and algorithm for classifying chronic rhinosinusitis: the JESREC Study. *Allergy* 2015; 70. DOI: 10.1111/all.12644.
8. DeConde AS, Mace JC, Levy JM, et al. Prevalence of polyp recurrence after endoscopic sinus surgery for chronic rhinosinusitis with nasal polyposis. *Laryngoscope* 2017; 127: 550-555. DOI: 10.1002/lary.26391.
9. Calus L, Van Bruaene N, Bosteels C, et al. Twelve-year follow-up study after endoscopic sinus surgery in patients with chronic rhinosinusitis with nasal polyposis. *Clin Transl Allergy* 2019; 9: 30. DOI: 10.1186/s13601-019-0269-4.
10. Pinto JM, Mehta N, DeTineo M, et al. A randomized, double-blind, placebo-controlled trial of anti-IgE for chronic rhinosinusitis. *Rhinology* 2010; 48: 318-324. DOI: 10.4193/Rhin09.144.
11. Gevaert P, Calus L, Van Zele T, et al. Omalizumab is effective in allergic and nonallergic patients with nasal polyps and asthma. *J Allergy Clin Immunol* 2013; 131: 110-116.e111. 2012/10/02. DOI: 10.1016/j.jaci.2012.07.047.
12. Hong CJ, Tsang AC, Quinn JG, et al. Anti-IgE monoclonal antibody therapy for the treatment of chronic rhinosinusitis: a systematic review. *Syst Rev* 2015; 4: 166. DOI: 10.1186/s13643-015-0157-5.
13. Chong L-Y, Piromchai P, Sharp S, et al. Biologics for chronic rhinosinusitis. *Cochrane Database Syst Rev* 2020; 2: CD013513. DOI: 10.1002/14651858.CD013513.pub2.
14. Gevaert P, Omachi TA, Corren J, et al. Efficacy and safety of omalizumab in nasal polyposis: two randomized phase III trials. *Journal of allergy and clinical immunology* 2020. Journal Article.
15. Qingwu Wu, Rui Zheng, Huijun Qiu, et al. Anti-IgE monoclonal antibody in the

1  
2  
3 treatment of chronic rhinosinusitis with nasal polyps. PROSPERO 2020  
4 CRD42020207639 Available from:  
5  
6 [https://www.crd.york.ac.uk/prospero/display\\_record.php?ID=CRD42020207639](https://www.crd.york.ac.uk/prospero/display_record.php?ID=CRD42020207639).

7 16. Moher D, Liberati A, Tetzlaff J, et al. Preferred reporting items for systematic  
8 reviews and meta-analyses: the PRISMA statement. *Ann Intern Med* 2009; 151.

9 17. NCT01066104. Subcutaneous omalizumab for treatment of chronic rhinosinusitis  
10 with nasal polyposis. [https:// clinicaltrials.gov/show/nct01066104](https://clinicaltrials.gov/show/nct01066104) 2009. [CRS:  
11 1647960].  
12

13 18. Higgins JPT, Green S (editors). *Cochrane Handbook for Systematic Reviews of*  
14 *Interventions* Version 5.1.0 [updated March 2011]. The Cochrane Collaboration, 2011.  
15 Available from [www.cochrane-handbook.org](http://www.cochrane-handbook.org).  
16  
17  
18  
19  
20  
21  
22  
23  
24  
25  
26  
27  
28  
29  
30  
31  
32  
33  
34  
35  
36  
37  
38  
39  
40  
41  
42  
43  
44  
45  
46  
47  
48  
49  
50  
51  
52  
53  
54  
55  
56  
57  
58  
59  
60

**Appendix 1. Search strategies**

| <b>Pubmed</b>                                                                                                                                                                                                                                                     |
|-------------------------------------------------------------------------------------------------------------------------------------------------------------------------------------------------------------------------------------------------------------------|
| 1. nasal polyps[MeSH Terms]                                                                                                                                                                                                                                       |
| 2. (((nasal polyp*[Title/Abstract]) OR (nasal papilloma[Title/Abstract])) OR (nose polyp*[Title/Abstract])) OR (nasi papilloma[Title/Abstract])) OR (nasi polyposis[Title/Abstract])                                                                              |
| 3. #1 OR #2                                                                                                                                                                                                                                                       |
| 4. sinusitis[MeSH Terms]                                                                                                                                                                                                                                          |
| 5. ((((((chronic rhinosinusitis[Title/Abstract]) OR (rhinopolyp*[Title/Abstract])) OR (CRSwNP[Title/Abstract])) OR (sinus Infection*[Title/Abstract])) OR (rhinitis[Title/Abstract])) OR (pansinusitis[Title/Abstract])) OR (sphenoid* sinusitis[Title/Abstract]) |
| 6. #4 OR #5                                                                                                                                                                                                                                                       |
| 7. omalizumab[MeSH Terms]                                                                                                                                                                                                                                         |
| 8. (((Xolair[Title/Abstract]) OR (anti-IgE antibody[Title/Abstract])) OR (anti-IgE monoclonal antibody[Title/Abstract])) OR (anti-IgE mAb[Title/Abstract])                                                                                                        |
| 9. #7 OR #8                                                                                                                                                                                                                                                       |
| 10. #3 OR #6                                                                                                                                                                                                                                                      |
| 11. #9 AND #10                                                                                                                                                                                                                                                    |
| <b>Cochrane Library</b>                                                                                                                                                                                                                                           |
| 1. MeSH descriptor: [Nasal Polyps] explode all trees                                                                                                                                                                                                              |
| 2. (nasal polyp*):ti,ab,kw OR (nasal papilloma):ti,ab,kw OR (nose polyp*):ti,ab,kw OR (nasi papilloma):ti,ab,kw OR (nasi polyposis):ti,ab,kw (Word variations have been searched)                                                                                 |
| 3. #1 OR #2                                                                                                                                                                                                                                                       |
| 4. MeSH descriptor: [Sinusitis] explode all trees                                                                                                                                                                                                                 |
| 5. (chronic rhinosinusitis):ti,ab,kw OR (rhinopolyp*):ti,ab,kw OR (CRSwNP):ti,ab,kw OR (sinus infection*):ti,ab,kw OR (rhinitis):ti,ab,kw (Word variations have been searched)                                                                                    |
| 6. #4 OR #5                                                                                                                                                                                                                                                       |
| 7. (pansinusitis):ti,ab,kw OR (sphenoid* sinusitis):ti,ab,kw (Word variations have been searched)                                                                                                                                                                 |
| 8. #6 OR #7                                                                                                                                                                                                                                                       |
| 9. MeSH descriptor: [Omalizumab] explode all trees                                                                                                                                                                                                                |
| 10. (Xolair):ti,ab,kw OR (anti-IgE antibody):ti,ab,kw OR (anti-IgE monoclonal antibody):ti,ab,kw OR (anti-IgE mAb):ti,ab,kw (Word variations have been searched)                                                                                                  |
| 11. #9 OR #10                                                                                                                                                                                                                                                     |
| 12. #3 OR #8                                                                                                                                                                                                                                                      |
| 13. #11 AND #12                                                                                                                                                                                                                                                   |
| <b>Embase</b>                                                                                                                                                                                                                                                     |

1. 'nose polyp'/exp
2. 'nasal polyp\*' OR 'nasal papilloma'/exp OR 'nasal papilloma' OR 'nose polyp\*' OR 'nasi papilloma' OR 'nasi polyposis':ab,ti
3. #1 OR #2
4. 'sinusitis'/exp
5. 'chronic rhinosinusitis rhinopolyp\*' OR crswnp OR 'sinus infection\*' OR rhinitis OR pansinusitis OR 'sphenoid\* sinusitis':ab,ti
6. #4 OR #5
7. #3 OR #6
8. 'omalizumab'/exp
9. 'xolair' OR 'anti-ige antibody' OR 'anti-ige monoclonal antibody' OR 'anti-ige mab':ab,ti
10. #8 OR #9
11. #7 AND #10
12. #7 AND #10 AND [medline]/lim
13. #11 NOT #12

#### Web of Science

1. TOPIC: (nasal polyp\*) OR TOPIC: (nasal papilloma) OR TOPIC: (nose polyp\*) OR TOPIC: (nasi papilloma) OR TOPIC: (nasi polyposis)
2. TOPIC: (sinusitis) OR TOPIC: (chronic rhinosinusitis) OR TOPIC: (rhinopolyp\*) OR TOPIC: (CRSwNP) OR TOPIC: (sinus Infection\*) OR TOPIC: (rhinitis) OR TOPIC: (pansinusitis) OR TOPIC: (sphenoid\* sinusitis)
3. #1 OR #2
4. TOPIC: (omalizumab) OR TOPIC: (Xolair) OR TOPIC: (anti-IgE antibody) OR TOPIC: (anti-IgE monoclonal antibody) OR TOPIC: (anti-IgE mAb)
5. #3 AND #4

1  
2  
3  
4 **Table 1.** Summary of characteristics of included RCTs  
5

6 **Figure 1.** PRISMA flow diagram of the literature search.  
7

8  
9 **Figure 2.** ‘Risk of bias’ graph: review authors’ judgements about each risk of bias item  
10 presented as percentages across all included studies.  
11  
12

13  
14 **Figure 3.** ‘Risk of bias’ summary: review authors’ judgements about each risk of bias  
15 item for each included study.  
16  
17

18  
19 **Figure 4.** Meta-analyses of omalizumab versus placebo, comparing efficacy and safety.  
20  
21 Outcomes assessed are: (A) Nasal polyps score (NPS); (B) Nasal congestion score  
22 (NCS); (C) Sino-Nasal Outcome Test-22 (SNOT-22); (D) Total nasal symptom score  
23 (TNSS); (E) Serious adverse events (SAEs); (F) Adverse events (AEs); (G) Rescue  
24 systemic corticosteroid (RSCS) and (H) Reduced need for surgery (RNS).  
25  
26  
27  
28  
29  
30  
31  
32  
33  
34  
35  
36  
37  
38  
39  
40  
41  
42  
43  
44  
45  
46  
47  
48  
49  
50  
51  
52  
53  
54  
55  
56  
57  
58  
59  
60

**Table 1.** Summary of characteristics of included RCTs

| Study, year                               | Population                                             | Comorbidity                                                                           | Omalizumab*    | Placebo                            | Treatment length | Follow-up length | Age (y), mean (SD)      |                         | Male, no.(%) |           |
|-------------------------------------------|--------------------------------------------------------|---------------------------------------------------------------------------------------|----------------|------------------------------------|------------------|------------------|-------------------------|-------------------------|--------------|-----------|
|                                           |                                                        |                                                                                       |                |                                    |                  |                  | Omalizumab              | Placebo                 | Omalizumab   | Placebo   |
| Pinto 2010 <sup>10</sup><br>(n = 14)      | CRSwNP<br>(all had undergone endoscopic sinus surgery) | inhaled asthma therapy (72% (5/7) in omalizumab group and 43% (3/7) in placebo group) | subcutaneously | injection, same dose and frequency | 26 weeks         | 26 weeks         | 43.1 (9.8)              | 48.6 (9.1)              | 3 (43%)      | 7 (100%)  |
| Gevaert <sup>11</sup><br>2013<br>(n = 24) | CRSwNP                                                 | asthma (100%)                                                                         | subcutaneously | injection, same dose and frequency | 16 weeks         | 20 weeks         | 50 (44-56) <sup>#</sup> | 45 (42-54) <sup>#</sup> | 12 (80%)     | 4 (50%)   |
| POLYP1 <sup>14</sup><br>2020<br>(n = 138) | CRSwNP                                                 | asthma (58.3% (42/72) in omalizumab group and 48.5% (32/66) in placebo group)         | subcutaneously | injection, same dose and frequency | 24 weeks         | 24 weeks         | 50.0 (14.5)             | 52.2 (11.6)             | 47 (65.3)    | 41 (62.1) |
| POLYP2 <sup>14</sup><br>2020<br>(n = 127) | CRSwNP                                                 | asthma (61.3% (38/62) in omalizumab group and 60% (39/65) in placebo group)           | subcutaneously | injection, same dose and frequency | 24 weeks         | 24 weeks         | 49.0 (11.9)             | 51.0 (12.0)             | 39 (62.9)    | 44 (67.7) |

\*omalizumab subcutaneously (every 2 week or every month injections), based on total serum IgE levels and body weight, with a maximum dose of 375 mg; <sup>#</sup>mean (interquartile range, IQR); CRSwNP: chronic rhinosinusitis with nasal polyps; RCTs: randomized controlled trials; SD: standard deviation.

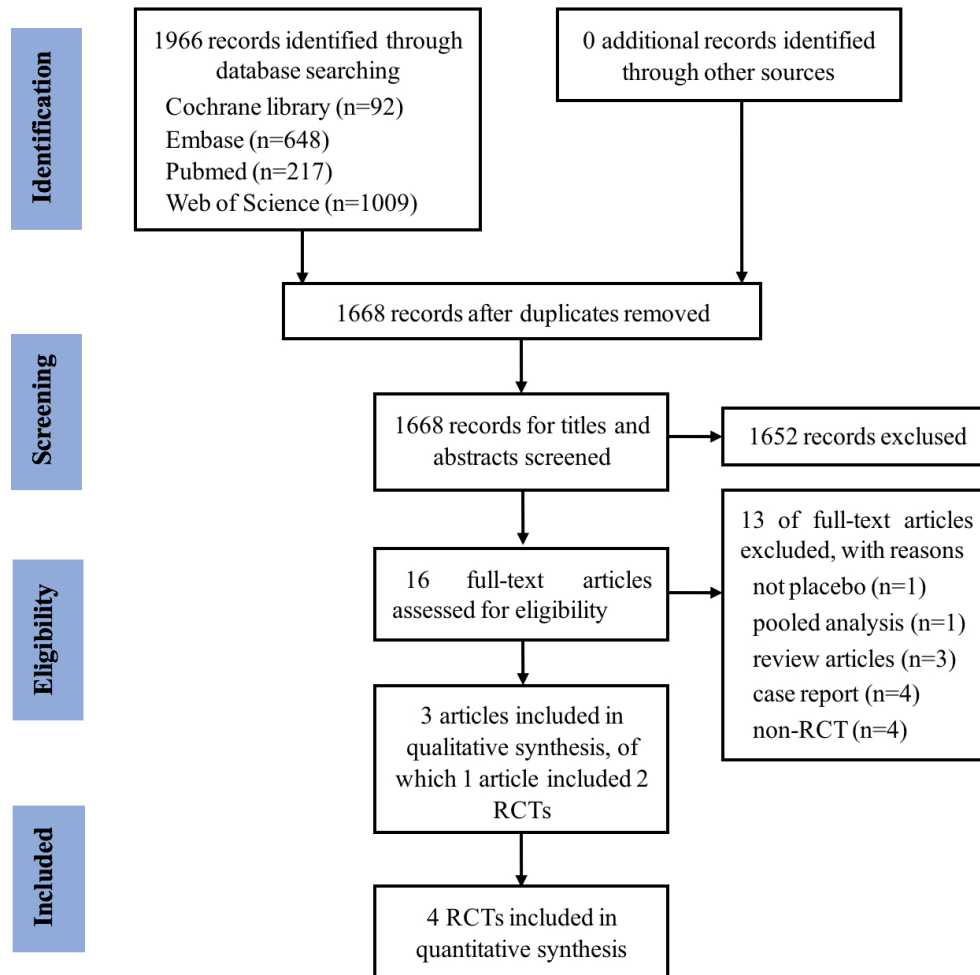

Figure 1. PRISMA flow diagram of the literature search.

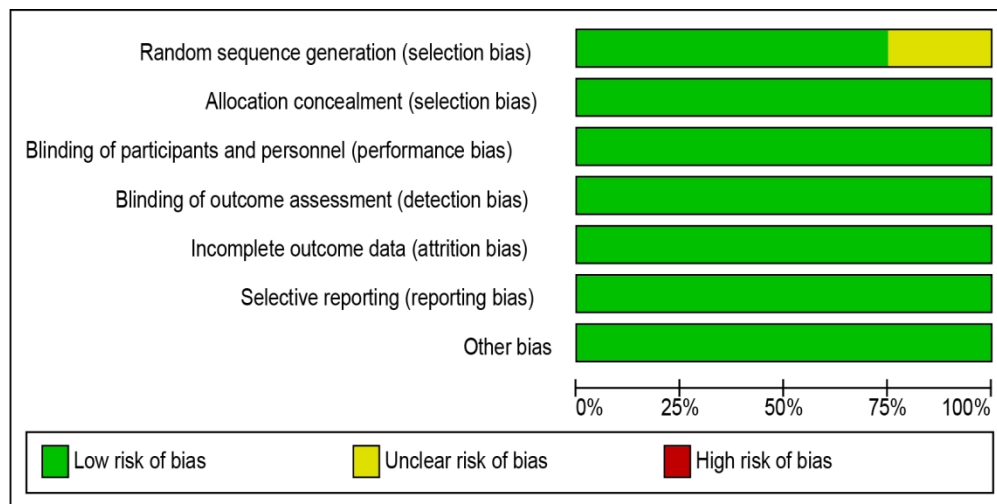

Figure 2. 'Risk of bias' graph: review authors' judgements about each risk of bias item presented as percentages across all included studies.



|              | Random sequence generation (selection bias) | Allocation concealment (selection bias) | Blinding of participants and personnel (performance bias) | Blinding of outcome assessment (detection bias) | Incomplete outcome data (attrition bias) | Selective reporting (reporting bias) | Other bias |
|--------------|---------------------------------------------|-----------------------------------------|-----------------------------------------------------------|-------------------------------------------------|------------------------------------------|--------------------------------------|------------|
| Gevaert 2013 | +                                           | +                                       | +                                                         | +                                               | +                                        | +                                    | +          |
| Pinto 2010   | ?                                           | +                                       | +                                                         | +                                               | +                                        | +                                    | +          |
| POLYP1 2020  | +                                           | +                                       | +                                                         | +                                               | +                                        | +                                    | +          |
| POLYP2 2020  | +                                           | +                                       | +                                                         | +                                               | +                                        | +                                    | +          |

Figure 3. 'Risk of bias' summary: review authors' judgements about each risk of bias item for each included study.

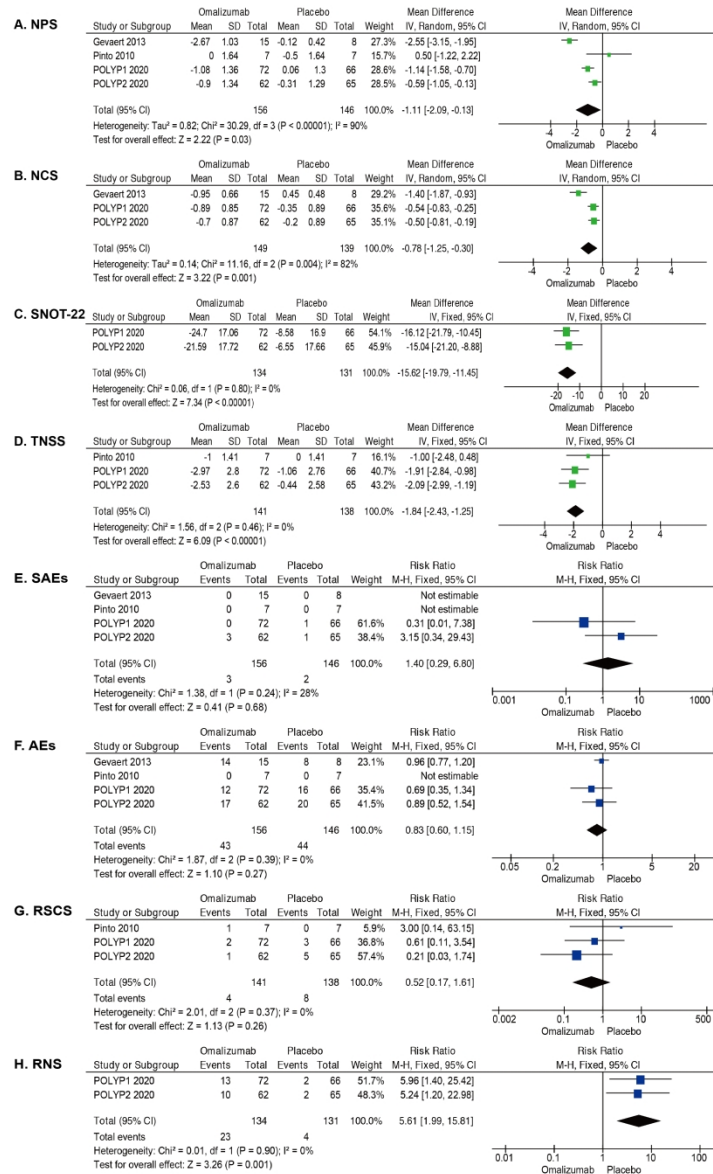

Figure 4. Meta-analyses of omalizumab versus placebo, comparing efficacy and safety. Outcomes assessed are: (A) Nasal polyps score (NPS); (B) Nasal congestion score (NCS); (C) Sino-Nasal Outcome Test-22 (SNOT-22); (D) Total nasal symptom score (TNSS); (E) Serious adverse events (SAEs); (F) Adverse events (AEs); (G) Rescue systemic corticosteroid (RSCS) and (H) Reduced need for surgery (RNS).

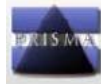

# PRISMA 2009 Checklist

| Section/topic                      | #  | Checklist item                                                                                                                                                                                                                                                                                              | Reported on page # |
|------------------------------------|----|-------------------------------------------------------------------------------------------------------------------------------------------------------------------------------------------------------------------------------------------------------------------------------------------------------------|--------------------|
| <b>TITLE</b>                       |    |                                                                                                                                                                                                                                                                                                             |                    |
| Title                              | 1  | Identify the report as a systematic review, meta-analysis, or both.                                                                                                                                                                                                                                         | 1                  |
| <b>ABSTRACT</b>                    |    |                                                                                                                                                                                                                                                                                                             |                    |
| Structured summary                 | 2  | Provide a structured summary including, as applicable: background; objectives; data sources; study eligibility criteria, participants, and interventions; study appraisal and synthesis methods; results; limitations; conclusions and implications of key findings; systematic review registration number. | 2-3                |
| <b>INTRODUCTION</b>                |    |                                                                                                                                                                                                                                                                                                             |                    |
| Rationale                          | 3  | Describe the rationale for the review in the context of what is already known.                                                                                                                                                                                                                              | 4                  |
| Objectives                         | 4  | Provide an explicit statement of questions being addressed with reference to participants, interventions, comparisons, outcomes, and study design (PICOS).                                                                                                                                                  | 4                  |
| <b>METHODS</b>                     |    |                                                                                                                                                                                                                                                                                                             |                    |
| Protocol and registration          | 5  | Indicate if a review protocol exists, if and where it can be accessed (e.g., Web address), and, if available, provide registration information including registration number.                                                                                                                               | 5                  |
| Eligibility criteria               | 6  | Specify study characteristics (e.g., PICOS, length of follow-up) and report characteristics (e.g., years considered, language, publication status) used as criteria for eligibility, giving rationale.                                                                                                      | 5                  |
| Information sources                | 7  | Describe all information sources (e.g., databases with dates of coverage, contact with study authors to identify additional studies) in the search and date last searched.                                                                                                                                  | 5                  |
| Search                             | 8  | Present full electronic search strategy for at least one database, including any limits used, such that it could be repeated.                                                                                                                                                                               | 5                  |
| Study selection                    | 9  | State the process for selecting studies (i.e., screening, eligibility, included in systematic review, and, if applicable, included in the meta-analysis).                                                                                                                                                   | 5                  |
| Data collection process            | 10 | Describe method of data extraction from reports (e.g., piloted forms, independently, in duplicate) and any processes for obtaining and confirming data from investigators.                                                                                                                                  | 5-6                |
| Data items                         | 11 | List and define all variables for which data were sought (e.g., PICOS, funding sources) and any assumptions and simplifications made.                                                                                                                                                                       | 6                  |
| Risk of bias in individual studies | 12 | Describe methods used for assessing risk of bias of individual studies (including specification of whether this was done at the study or outcome level), and how this information is to be used in any data synthesis.                                                                                      | 6                  |
| Summary measures                   | 13 | State the principal summary measures (e.g., risk ratio, difference in means).                                                                                                                                                                                                                               | 6                  |
| Synthesis of results               | 14 | Describe the methods of handling data and combining results of studies, if done, including measures of consistency (e.g., I <sup>2</sup> ) for each meta-analysis.                                                                                                                                          | 6                  |

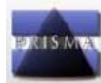

# PRISMA 2009 Checklist

Page 1 of 2

| Section/topic                 | #  | Checklist item                                                                                                                                                                                           | Reported on page # |
|-------------------------------|----|----------------------------------------------------------------------------------------------------------------------------------------------------------------------------------------------------------|--------------------|
| Risk of bias across studies   | 15 | Specify any assessment of risk of bias that may affect the cumulative evidence (e.g., publication bias, selective reporting within studies).                                                             | n/a                |
| Additional analyses           | 16 | Describe methods of additional analyses (e.g., sensitivity or subgroup analyses, meta-regression), if done, indicating which were pre-specified.                                                         | n/a                |
| <b>RESULTS</b>                |    |                                                                                                                                                                                                          |                    |
| Study selection               | 17 | Give numbers of studies screened, assessed for eligibility, and included in the review, with reasons for exclusions at each stage, ideally with a flow diagram.                                          | 7, Figure 1        |
| Study characteristics         | 18 | For each study, present characteristics for which data were extracted (e.g., study size, PICOS, follow-up period) and provide the citations.                                                             | 7, Table 1         |
| Risk of bias within studies   | 19 | Present data on risk of bias of each study and, if available, any outcome level assessment (see item 12).                                                                                                | 7; Figure 2 and 3  |
| Results of individual studies | 20 | For all outcomes considered (benefits or harms), present, for each study: (a) simple summary data for each intervention group (b) effect estimates and confidence intervals, ideally with a forest plot. | 7-9; Figure 4      |
| Synthesis of results          | 21 | Present results of each meta-analysis done, including confidence intervals and measures of consistency.                                                                                                  | 7-9; Figure 4      |
| Risk of bias across studies   | 22 | Present results of any assessment of risk of bias across studies (see Item 15).                                                                                                                          | n/a                |
| Additional analysis           | 23 | Give results of additional analyses, if done (e.g., sensitivity or subgroup analyses, meta-regression [see Item 16]).                                                                                    | n/a                |
| <b>DISCUSSION</b>             |    |                                                                                                                                                                                                          |                    |
| Summary of evidence           | 24 | Summarize the main findings including the strength of evidence for each main outcome; consider their relevance to key groups (e.g., healthcare providers, users, and policy makers).                     | 9-10               |
| Limitations                   | 25 | Discuss limitations at study and outcome level (e.g., risk of bias), and at review-level (e.g., incomplete retrieval of identified research, reporting bias).                                            | 10-11              |
| Conclusions                   | 26 | Provide a general interpretation of the results in the context of other evidence, and implications for future research.                                                                                  | 11                 |
| <b>FUNDING</b>                |    |                                                                                                                                                                                                          |                    |
| Funding                       | 27 | Describe sources of funding for the systematic review and other support (e.g., supply of data); role of funders for the systematic review.                                                               | 12                 |

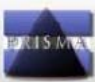

# PRISMA 2009 Checklist

- 1
- 2
- 3
- 4
- 5
- 6
- 7
- 8
- 9
- 10
- 11
- 12
- 13
- 14
- 15
- 16
- 17
- 18
- 19
- 20
- 21
- 22
- 23
- 24
- 25
- 26
- 27
- 28
- 29
- 30
- 31
- 32
- 33
- 34
- 35
- 36
- 37
- 38
- 39
- 40
- 41
- 42
- 43
- 44
- 45
- 46
- 47

For more information, visit: [www.prisma-statement.org](http://www.prisma-statement.org).

Page 2 of 2

For peer review only

# BMJ Open

## Efficacy and safety of omalizumab in chronic rhinosinusitis with nasal polyps: a systematic review and meta-analysis of randomized controlled trials

|                                 |                                                                                                                                                                                                                                                                                                                                                                                                                                                                                                                                                                                                                                                                                                                                                            |
|---------------------------------|------------------------------------------------------------------------------------------------------------------------------------------------------------------------------------------------------------------------------------------------------------------------------------------------------------------------------------------------------------------------------------------------------------------------------------------------------------------------------------------------------------------------------------------------------------------------------------------------------------------------------------------------------------------------------------------------------------------------------------------------------------|
| Journal:                        | <i>BMJ Open</i>                                                                                                                                                                                                                                                                                                                                                                                                                                                                                                                                                                                                                                                                                                                                            |
| Manuscript ID                   | bmjopen-2020-047344.R1                                                                                                                                                                                                                                                                                                                                                                                                                                                                                                                                                                                                                                                                                                                                     |
| Article Type:                   | Original research                                                                                                                                                                                                                                                                                                                                                                                                                                                                                                                                                                                                                                                                                                                                          |
| Date Submitted by the Author:   | 27-Mar-2021                                                                                                                                                                                                                                                                                                                                                                                                                                                                                                                                                                                                                                                                                                                                                |
| Complete List of Authors:       | Wu, Qingwu; Third Affiliated Hospital of Sun Yat-Sen University, Department of Otorhinolaryngology-Head and Neck Surgery<br>Yuan, Lianxiong; Third Affiliated Hospital of Sun Yat-Sen University, Department of Science and Research<br>Qiu, Huijun; Third Affiliated Hospital of Sun Yat-Sen University<br>Wang, Xinyue; Third Affiliated Hospital of Sun Yat-Sen University, Otorhinolaryngology-Head and Neck Surgery<br>Huang, Xue-Kun; Third Affiliated Hospital of Sun Yat-Sen University, Department of Otorhinolaryngology-Head and Neck Surgery<br>Zheng, Rui ; Third Affiliated Hospital of Sun Yat-Sen University<br>Yang, Qintai; Third Affiliated Hospital of Sun Yat-Sen University, Department of Otorhinolaryngology-Head and Neck Surgery |
| <b>Primary Subject Heading</b>: | Ear, nose and throat/otolaryngology                                                                                                                                                                                                                                                                                                                                                                                                                                                                                                                                                                                                                                                                                                                        |
| Secondary Subject Heading:      | Ear, nose and throat/otolaryngology                                                                                                                                                                                                                                                                                                                                                                                                                                                                                                                                                                                                                                                                                                                        |
| Keywords:                       | Adult otolaryngology < OTOLARYNGOLOGY, Endoscopic surgery < OTOLARYNGOLOGY, Adverse events < THERAPEUTICS, Clinical trials < THERAPEUTICS                                                                                                                                                                                                                                                                                                                                                                                                                                                                                                                                                                                                                  |
|                                 |                                                                                                                                                                                                                                                                                                                                                                                                                                                                                                                                                                                                                                                                                                                                                            |

SCHOLARONE™  
Manuscripts



I, the Submitting Author has the right to grant and does grant on behalf of all authors of the Work (as defined in the below author licence), an exclusive licence and/or a non-exclusive licence for contributions from authors who are: i) UK Crown employees; ii) where BMJ has agreed a CC-BY licence shall apply, and/or iii) in accordance with the terms applicable for US Federal Government officers or employees acting as part of their official duties; on a worldwide, perpetual, irrevocable, royalty-free basis to BMJ Publishing Group Ltd ("BMJ") its licensees and where the relevant Journal is co-owned by BMJ to the co-owners of the Journal, to publish the Work in this journal and any other BMJ products and to exploit all rights, as set out in our [licence](#).

The Submitting Author accepts and understands that any supply made under these terms is made by BMJ to the Submitting Author unless you are acting as an employee on behalf of your employer or a postgraduate student of an affiliated institution which is paying any applicable article publishing charge ("APC") for Open Access articles. Where the Submitting Author wishes to make the Work available on an Open Access basis (and intends to pay the relevant APC), the terms of reuse of such Open Access shall be governed by a Creative Commons licence – details of these licences and which [Creative Commons](#) licence will apply to this Work are set out in our licence referred to above.

Other than as permitted in any relevant BMJ Author's Self Archiving Policies, I confirm this Work has not been accepted for publication elsewhere, is not being considered for publication elsewhere and does not duplicate material already published. I confirm all authors consent to publication of this Work and authorise the granting of this licence.

1 **Efficacy and safety of omalizumab in chronic rhinosinusitis with nasal polyps:**  
2 **a systematic review and meta-analysis of randomized controlled trials**

3 Qingwu Wu<sup>1,2\*</sup>, Lianxiong Yuan<sup>3\*</sup>, Huijun Qiu<sup>1\*</sup>, Xinyue Wang<sup>1</sup>, Xuekun  
4 Huang<sup>1</sup>, Rui Zheng<sup>1,2#</sup>, Qintai Yang<sup>1,2#</sup>

5 <sup>1</sup> Department of Otorhinolaryngology-Head and Neck Surgery, The Third Affiliated  
6 Hospital of Sun Yat-Sen University, Guangzhou 510630, China

7 <sup>2</sup> Department of Allergy, The Third Affiliated Hospital of Sun Yat-Sen University,  
8 Guangzhou 510630, China

9 <sup>3</sup> Department of Science and Research, The Third Affiliated Hospital of Sun Yat-Sen  
10 University, Guangzhou 510630, China

11 \*The authors contributed equally to this work.

12 #Corresponding author

13 Rui Zheng, MD and Qintai Yang, MD, PhD

14 Department of Otolaryngology-Head and Neck Surgery

15 The Third Affiliated Hospital of Sun Yat-Sen University

16 No. 600 Tianhe Road, Guangzhou 510630, China

17 Phone: 020-85252239

18 E-mail: rui.zheng@qq.com and yangqint@mail.sysu.edu.cn

19



1  
2  
3  
4     20    **Abstract**

5  
6  
7     21    **Objectives**

8  
9     22    To assess the efficacy and safety of omalizumab for chronic rhinosinusitis with nasal  
10  
11  
12    23    polyps (CRSwNP) and to identify evidence gaps that will guide future research on  
13  
14  
15    24    omalizumab for CRSwNP.

16  
17    25    **Design**

18  
19  
20    26    Systematic review and meta-analysis.

21  
22  
23    27    **Data Sources**

24  
25  
26    28    A comprehensive search was performed in PubMed, Embase, Web of Science, and the  
27  
28  
29    29    Cochrane Library on 13 October 2020.

30  
31    30    **Eligibility Criteria**

32  
33  
34    31    Randomized controlled trials (RCTs) comparing omalizumab with placebo, given for  
35  
36  
37    32    at least 16 weeks in adult patients with CRSwNP.

38  
39    33    **Data extraction and synthesis**

40  
41  
42    34    Two independent authors screened search results, extracted data and assessed studies  
43  
44  
45    35    using the Cochrane risk of bias tool. Data were pooled using the inverse-variance  
46  
47  
48    36    method and expressed as mean differences (MDs) with 95% CIs. Heterogeneity was  
49  
50  
51    37    assessed by the Chi<sup>2</sup> test and the I<sup>2</sup> statistic.

52  
53    38    **Results**

54  
55  
56    39    A total of 4 RCTs involving 303 participants were identified. When comparing  
57  
58  
59    40    omalizumab to placebo, there was a significant difference in nasal polyps score (mean  
60

1  
2  
3  
4 41 difference (MD) = -1.20; 95% confidence interval (CI), -1.48 to -0.92), nasal  
5  
6  
7 42 congestion score (MD = -0.67; 95% CI, -0.86 to -0.48), Sino-Nasal Outcome Test-22  
8  
9  
10 43 (MD = -15.62; 95% CI, -19.79 to -11.45), total nasal symptom score (MD = -1.84; 95%  
11  
12  
13 44 CI, -2.43 to -1.25), and reduced need for surgery (risk ratio (RR) = 5.61; 95% CI, 1.99  
14  
15 45 to 15.81). Furthermore, there was no difference in the risk of serious adverse events  
16  
17  
18 46 ((RR = 1.40; 95% CI, 0.29 to 6.80), adverse events (RR = 0.83; 95% CI, 0.60 to 1.15)  
19  
20  
21 47 and rescue systemic corticosteroid (RR = 0.52; 95% CI, 0.17 to 1.61).

## 22 23 48 **Conclusions**

24  
25  
26 49 This was the first meta-analysis that identified omalizumab significantly improved  
27  
28  
29 50 endoscopic, clinical, and patient-reported outcomes in adults with moderate to severe  
30  
31  
32 51 CRSwNP and it was safe and well-tolerated.

## 33 34 52 **PROSPERO registration number**

35  
36  
37 53 CRD42020207639.

38  
39  
40 54 **Keywords:** omalizumab; anti-IgE antibody; chronic rhinosinusitis; nasal polyps;  
41  
42 55 systematic review; meta-analysis

## 43 44 56 **Strengths and limitation of this study**

- 45  
46  
47 57 1. This systematic review and meta-analysis was based on a comprehensive search and  
48  
49  
50 58 included RCTs.  
51  
52  
53 59 2. Studies were low risk of bias, which was assessed by the Cochrane risk of bias tool.  
54  
55  
56 60 3. Because the longest follow-up of 4 RCTs was only up to 26 weeks, there were too  
57  
58  
59 61 short to comprehensively and adequately assess the risks of side effect.

## 62 Introduction

63 Chronic rhinosinusitis (CRS) is common and affects up to 5-12% of the general  
64 population<sup>1</sup>. It is defined as inflammation of the nose and the paranasal sinuses  
65 characterized by nasal congestion, nasal discharge, facial pressure, and loss of smell.  
66 CRS with nasal polyps (CRSwNP) is a severe form of CRS and accounts for 18% of  
67 patients with CRS<sup>2</sup>. CRSwNP is associated with adult-onset asthma, decreased health-  
68 related quality of life (HRQoL)<sup>3, 4</sup>, and substantial economic burden<sup>5</sup>. Many patients  
69 with CRSwNP often fail to achieve sufficient benefit from intranasal corticosteroids  
70 (INCS) or systemic corticosteroids (SCS) and/ or functional endoscopic sinus surgery  
71 (FESS)<sup>6</sup>. Although FESS may be successful initially, relapse occurs in 20% of patients  
72 after 12 months<sup>7</sup>, in 40% after 18 months<sup>8</sup>, and in 80% after 12 years despite ongoing  
73 INCS therapy<sup>9</sup>. Therefore, novel treatments such as biologics are needed for CRSwNP.  
74 Omalizumab (anti-IgE antibody) is one of the biologics and may help patients with  
75 severe CRSwNP. It was reported that omalizumab made their symptom better and  
76 shrank their polyps in small-size randomized controlled trials (RCTs)<sup>10, 11</sup>. But some of  
77 its effectiveness and safety are not well known. Thus, some systematic reviews were  
78 conducted to assess the effectiveness and safety of it. But they found very little  
79 information or insufficient evidence about the use of omalizumab and cannot determine  
80 whether it was effective or not<sup>12, 13</sup>. Currently, some well-designed RCTs about  
81 omalizumab for CRSwNP were published<sup>14</sup>, which may provide us with some evidence.  
82 Therefore, this systematic review was conducted to evaluate the efficacy and safety of

1  
2  
3  
4 83 omalizumab versus placebo in adult patients with CRSwNP, and identify evidence gaps  
5  
6  
7 84 that will guide future research on omalizumab for CRSwNP.  
8  
9

## 10 85 **Methods**

11  
12  
13 86 We performed a systematic review based on a priori protocol that was registered with  
14  
15 87 PROSPERO (No. CRD42020207639)<sup>15</sup>. This review was reported according to the  
16  
17  
18 88 Preferred Reporting Items for Systematic reviews and Meta-Analyses (PRISMA)  
19  
20  
21 89 statement<sup>16</sup> (Additional file 1).  
22

## 23 90 **Eligibility criteria**

24  
25  
26 91 (a) Population: adult patients (>18) with CRSwNP; (b) Intervention and comparison:  
27  
28  
29 92 studies comparing omalizumab with placebo, given for at least 16 weeks; (c) Primary  
30  
31  
32 93 outcomes: nasal polyps score, nasal congestion score, and Sino-Nasal Outcome Test-  
33  
34  
35 94 22 score; Secondary outcomes: total nasal symptom score, serious adverse events,  
36  
37  
38 95 adverse events, rescue systemic corticosteroid, and reduced need for surgery. (d)  
39  
40  
41 96 Study design: randomized controlled trials (RCTs); (e) Studies written and published  
42  
43  
44 97 in the English language were included.

## 45 98 **Search strategy and selection process**

46  
47  
48 99 A comprehensive search was performed in PubMed, Embase, Web of Science, and the  
49  
50  
51 100 Cochrane Library on 13 October 2020. We used the following combined text and  
52  
53  
54 101 MeSH terms: “nasal polyps”, “sinusitis” and “omalizumab”. Search strategies for major  
55  
56  
57 102 databases are provided in Appendix 1.  
58  
59 103 Titles and abstracts of the retrieved articles were then screened for their potential  
60

1  
2  
3  
4 104 relevance by two reviewers (Q.W Wu and L.X Yuan ). The full-text articles were  
5  
6  
7 105 obtained and assessed by the same reviewers to determine whether they met the  
8  
9  
10 106 inclusion criteria for this review. We resolved any differences by a discussion with a  
11  
12 107 third author (Q.T Yang).

### 13 14 15 108 **Data extraction**

16  
17 109 Two reviewers (H.J Qiu and X.Y Wang) read full-text articles and extracted data using  
18  
19  
20 110 a pre-defined extraction form. Data were extracted on the following: first author, year  
21  
22  
23 111 of publication, patient characteristics, study methods, and outcome data.

### 24 25 26 112 **Assessment of risk of bias**

27  
28 113 In this review, the original version of the Cochrane ‘Risk of bias’ tool was used to assess  
29  
30  
31 114 the risk of bias in included studies. The risk of bias was assessed as ‘low’, ‘high’ or  
32  
33  
34 115 ‘unclear’ for each of the following six domains: sequence generation; allocation  
35  
36  
37 116 concealment; blinding of participants, personnel and outcome assessment; incomplete  
38  
39  
40 117 outcome data; selective reporting; other sources of bias (if required).

### 41 42 118 **Statistical analysis**

43  
44  
45 119 Study characteristics were shown in tables and described narratively. For dichotomous  
46  
47  
48 120 data, we planned to analyze treatment differences as a risk ratio (RR) calculated using  
49  
50  
51 121 the Mantel-Haenszel methods. For continuous outcomes, a generic inverse-variance  
52  
53  
54 122 method with fixed-effects models was used to calculate pooled mean differences and  
55  
56  
57 123 95% confidence interval. Statistical heterogeneity was assessed by the Chi<sup>2</sup> test (with a  
58  
59  
60 124 significance level set at P value < 0.10) and the I<sup>2</sup> statistic (I<sup>2</sup> ≥ 50% indicates

1  
2  
3  
4 125 substantial heterogeneity). There are two large pharma-sponsored RCTs with most of  
5  
6  
7 126 the information and two smaller RCTs with effect sizes much larger and much smaller  
8  
9  
10 127 than the two main studies. A random-effects meta-analysis will exacerbate the effects  
11  
12 128 of the bias. Therefore, we choose a fixed-effect analysis that will be affected less,  
13  
14  
15 129 although strictly it will also be inappropriate. Sensitivity analysis were performed,  
16  
17  
18 130 which included the removal of each single study from the meta-analysis one at a time  
19  
20  
21 131 and recalculation of the summary effect. The possibility of publication bias was  
22  
23 132 assessed by constructing a funnel plot if sufficient studies ( $> 10$ ) were available for an  
24  
25  
26 133 outcome. All meta-analysis were conducted by the Review Manager (version 5.3).

27  
28 134  
29  
30  
31  
32  
33  
34  
35  
36  
37  
38  
39  
40  
41  
42  
43  
44  
45  
46  
47  
48  
49  
50  
51  
52  
53  
54  
55  
56  
57  
58  
59  
60

1  
2  
3  
4 135 **Results**

5  
6  
7 136 **Study selection**

8  
9 137 We identified 1966 studies, of which 3 (with data for 302 participants) were included  
10  
11  
12 138 in our analysis (Figure 1). The 3 studies (Pinto 2010<sup>10</sup>, Gevaert 2013<sup>11</sup>, and Gavaert  
13  
14  
15 139 2020<sup>14</sup>) were published between 2010 and 2020, of which Gavaert 2020 reported 2  
16  
17  
18 140 RCTs (POLYP1 2020 and POLYP2 2020).

19  
20 141 **Study characteristics**

21  
22  
23 142 A summary of key participant characteristics, interventions, and comparison pairs was  
24  
25  
26 143 shown in Table 1. Except for 2 participants in Pinto 2010, all the participants were  
27  
28  
29 144 adults with CRSwNP. All the studies were double-blind RCTs and used a placebo.  
30  
31 145 Study duration ranged from 20 weeks to 26 weeks.  
32  
33  
34  
35  
36  
37  
38  
39  
40  
41  
42  
43  
44  
45  
46  
47  
48  
49  
50  
51  
52  
53  
54  
55  
56  
57  
58  
59  
60

146 **Table 1.** Summary of characteristics of included RCTs

| Study, year                               | Population                                             | Comorbidity                                                                           | Omalizumab*    | Placebo                            | Treatment length | Follow-up length | Age (y), mean (Range) |              | Male, no.(%) |           |
|-------------------------------------------|--------------------------------------------------------|---------------------------------------------------------------------------------------|----------------|------------------------------------|------------------|------------------|-----------------------|--------------|--------------|-----------|
|                                           |                                                        |                                                                                       |                |                                    |                  |                  | Omalizumab            | Placebo      | Omalizumab   | Placebo   |
| Pinto 2010 <sup>10</sup><br>(n = 14)      | CRSwNP<br>(all had undergone endoscopic sinus surgery) | inhaled asthma therapy (72% (5/7) in omalizumab group and 43% (3/7) in placebo group) | subcutaneously | injection, same dose and frequency | 26 weeks         | 26 weeks         | 43.1 (18-75)          | 48.6 (18-75) | 3 (43%)      | 7 (100%)  |
| Gevaert <sup>11</sup><br>2013<br>(n = 24) | CRSwNP                                                 | asthma (100%)                                                                         | subcutaneously | injection, same dose and frequency | 16 weeks         | 20 weeks         | 50 (≥18)              | 45 (≥18)     | 12 (80%)     | 4 (50%)   |
| POLYP1 <sup>14</sup><br>2020<br>(n = 138) | CRSwNP                                                 | asthma (58.3% (42/72) in omalizumab group and 48.5% (32/66) in placebo group)         | subcutaneously | injection, same dose and frequency | 24 weeks         | 24 weeks         | 50.0 (18-75)          | 52.2 (18-75) | 47 (65.3)    | 41 (62.1) |
| POLYP2 <sup>14</sup><br>2020<br>(n = 127) | CRSwNP                                                 | asthma (61.3% (38/62) in omalizumab group and 60% (39/65) in placebo group)           | subcutaneously | injection, same dose and frequency | 24 weeks         | 24 weeks         | 49.0 (18-75)          | 51.0 (18-75) | 39 (62.9)    | 44 (67.7) |

147

\*omalizumab subcutaneously (every 2 week or every month injections), based on total serum IgE levels and body weight, with a maximum dose of 375 mg; CRSwNP: chronic rhinosinusitis with nasal polyps; RCTs: randomized controlled trials.



## 149 **Risk of bias and quality of the clinical trials**

150 There were 4 RCTs included in this review. Overall the risk of bias was low, except the  
151 random sequence generation of Pinto 2010 was unclear. Our judgments about each risk  
152 of bias item presented as percentages across all included studies were shown in Figure  
153 2. Our judgments about each risk of bias item for each included study were shown in  
154 Figure 3.

## 155 **Primary outcomes**

156 Total nasal polyps score (NPS) ranges from 0 to 8 (sum of 0-4 for left and right nasal  
157 passage scores per participant), with a lower score indicating smaller-sized nasal polyps  
158 and the highest score indicating large polyps causing complete obstruction of the  
159 inferior nasal cavity.

160 The mean difference (MD) in the change of NPS was -1.20 (95% confidence interval  
161 (CI), -1.48 to -0.92; 4 RCTs; 302 participants;  $I^2 = 90\%$ ; Figure 4A). We noted the high  
162  $I^2$  value and Pinto 2020 had no significant reduction in NPS. However, the removal of  
163 Pinto 2020 did not change the overall effect size in sensitivity analyses. Therefore, we  
164 considered the certainty of the evidence to be high despite the large  $I^2$  value.

165 Nasal congestion score (NCS) was assessed daily by the participant via an electronic  
166 diary as the response to the following question: Is your nose blocked? The four  
167 available response options were scored from 0 (no symptoms) to 3 (severe symptoms).  
168 The pooled mean difference of NCS is -0.67 favoring the groups receiving omalizumab  
169 (95% CI, -0.86 to -0.48; 3 RCTs; 288 participants;  $I^2 = 82\%$ ; Figure 4B). Although the

1  
2  
3  
4 170 heterogeneity was high in this analysis, all 3 RCTs showed a significant reduction in  
5  
6  
7 171 NCS with omalizumab.

8  
9 172 The mean difference in the change of Sino-Nasal Outcome Test-22 (SNOT-22) score  
10  
11  
12 173 was 15.62 points lower in participants who received omalizumab (MD = -15.62; 95%  
13  
14  
15 174 CI, -19.79 to -11.45; 265 participants;  $I^2 = 0\%$ ; Figure 4C). There was an improvement  
16  
17  
18 175 of at least the minimal clinically important difference (MCID;  $\geq 8.9$  points).<sup>17</sup> Because  
19  
20  
21 176 the different measuring tools (Pinto 2010, SNOT-20; Gevaert 2013, Short-Form Health  
22  
23 177 Questionnaire (SF-36)) and unavailable data , these 2 RCTs were excluded in this  
24  
25  
26 178 pooled analysis.

### 27 28 179 **Secondary outcomes**

29  
30  
31 180 Total nasal symptom score (TNSS) was defined as the sum of the scores for nasal  
32  
33  
34 181 congestion score, anterior rhinorrhea score, posterior rhinorrhea score, and sense of  
35  
36  
37 182 smell score, ranging from 0 (no symptoms) to 12 (most severe symptoms).

38  
39 183 The mean difference in the change of TNSS was 1.84 points lower in omalizumab  
40  
41  
42 184 group (MD = -1.84; 95% CI, -2.43 to -1.25; 3 RCTs; 279 participants;  $I^2 = 0\%$ ; Figure  
43  
44  
45 185 4D).

46  
47 186 No serious adverse events (SAEs) were reported in Gevaert 2013 and Pinto 2010.  
48  
49  
50 187 However, POLYP1 2020 reported 1 case in the placebo group with myocardial  
51  
52  
53 188 infarction and POLYP2 2020 reported 1 case of pneumonia in the placebo group and 3  
54  
55  
56 189 cases in the omalizumab group (1 snake bite, 1 hand fracture, and 1 asthma  
57  
58 190 exacerbation). The pooled result indicated that there was no difference in the risk of  
59  
60

1  
2  
3  
4 191 SAEs (risk ratio (RR) = 1.40; 95% CI, 0.29 to 6.80; 4 RCTs; 302 participants;  $I^2 = 28\%$ ;

5  
6  
7 192 Figure 5A).

8  
9 193 There was no difference in the risk of adverse events (AEs) (RR = 0.83; 95% CI, 0.60

10  
11  
12 194 to 1.15; 4 RCTs; 302 participants;  $I^2 = 0\%$ ; Figure 5B). It was uncertain where or not

13  
14  
15 195 there was a difference in the risk of rescue systemic corticosteroid (RSCS; RR = 0.52;

16  
17  
18 196 95% CI, 0.17 to 1.61; 3 RCTs; 279 participants;  $I^2 = 0\%$ ; Figure 5C).

19  
20 197 Reduced need for surgery (RNS) through week 24 was defined as achievement of NPS

21  
22  
23 198 of 4 or lower ( $\leq 2$  for each nostril). POLYP1 2020 and POLYP2 2020 reported the

24  
25  
26 199 number of RNS. The proportion was higher in the group that received omalizumab (RR

27  
28  
29 200 = 5.61; 95% CI, 1.99 to 15.81; 2 RCTs; 265 participants;  $I^2 = 0\%$ ; Figure 5D).

30  
31 201

## 202 **Discussion**

### 203 **Principal findings**

204 This systematic review and meta-analysis identified 4 RCTs with 302 participants  
205 evaluating the efficacy and safety of omalizumab in CRSwNP. It showed that  
206 omalizumab significantly improved the size of nasal polyps (measured by NPS),  
207 symptoms (measured by NCS and TNSS), and Health-related quality of life (HRQoL;  
208 measured by SNOT-22), and reduce the need for surgery (measured by RNS). What's  
209 more, there was no difference in the risk of SAEs, AEs, and RSCS.

### 210 **Comparison with other studies**

211 Hong included two studies (Gavaert 2013 and Pinto 2010) and made a narrative  
212 systematic review<sup>12</sup>. They concluded that there was insufficient evidence to determine  
213 the effectiveness of omalizumab for CRS. In Chong's systematic review and meta-  
214 analysis, there were 3 small studies with 65 participants (Gavaert 2013, Pinto 2010, and  
215 NCT01066104) evaluated omalizumab<sup>13</sup>. Their results also showed that there were very  
216 uncertain about the effect of omalizumab on disease-specific HRQoL, severe adverse  
217 events, the extent of disease (CT scan scores), generic HRQoL, and adverse effects.  
218 NCT01066104<sup>18</sup> included in Chong's review was unpublished data, so it was excluded  
219 in our study according to our inclusion criteria.

### 220 **Implication for future research and clinical practice**

221 Patients with CRSwNP and comorbid asthma often have a high symptom burden,  
222 substantial impact on HRQoL, a higher risk of RSCS and revision surgery<sup>1</sup>. Moreover,

1  
2  
3  
4 223 patients with asthma are more likely to develop CRSwNP than are those without asthma,  
5  
6  
7 224 and they are more likely to receive more oral corticosteroid courses.<sup>19</sup> Therefore, the  
8  
9  
10 225 risk of RSCS may be due to asthma comorbidity.

11  
12 226 There were 4 RCTs included in this systematic review, which recruited patients with  
13  
14  
15 227 moderate to severe CRSwNP. The patients in omalizumab group reduced disease  
16  
17  
18 228 severity and need for surgery, and experienced significant improvements in HRQoL  
19  
20  
21 229 (measured by SNOT-22). Placebo-corrected improvements of SNOT-22 was 15.6  
22  
23  
24 230 points, which exceeded the commonly accepted MCID of 8.9 points.<sup>17,20</sup> Furthermore,  
25  
26  
27 231 there was no increased risk of SAEs and AEs in patients treated with omalizumab. Thus,  
28  
29  
30 232 it was certain that omalizumab significantly improved endoscopic, clinical, and patient-  
31  
32  
33 233 reported outcomes in moderate to severe CRSwNP and it was well tolerated.

34  
35 234 However, it is still unknown that omalizumab is effective in patients with less severe  
36  
37  
38 235 CRSwNP (such as serum IgE level <30 IU/mL and NPS=1 for each nostril or unilateral  
39  
40  
41 236 nostril) and more affordable compared to conventional treatment with topical and  
42  
43  
44 237 systemic corticosteroids and surgery. Therefore, studies are required to evaluate their  
45  
46  
47 238 effectiveness in patients with less severe diseases and their cost in the treatment. In  
48  
49  
50 239 addition, long-term observational studies are also required to determine if omalizumab  
51  
52  
53 240 lose its effectiveness over time, or whether there are any late adverse events.

#### 54 241 **Limitations of the study**

55  
56 242 Despite the strict methodology of this systematic review and meta-analysis using  
57  
58  
59 243 PRISMA guidelines, certain limitations should be considered. First, 4 RCTs were  
60

1  
2  
3  
4 244 recruited from the same group with moderate to severe CRSwNP. Therefore, there is  
5  
6  
7 245 no evidence on whether or not patients with less severe CRSwNP (serum IgE level <30  
8  
9  
10 246 IU/mL and NPS=1 for each nostril or unilateral nostril) would benefit. Secondly, 4  
11  
12 247 RCTs were all in adults and no available data for children. Thirdly, because the longest  
13  
14  
15 248 follow-up of 4 RCTs was only up to 26 weeks, there were too short to comprehensively  
16  
17  
18 249 and adequately assess the risks of side effect, RSCS, and RNS. Finally, there were only  
19  
20  
21 250 4 RCTs (<10), so a possibility of publication bias was not assessed by constructing a  
22  
23 251 funnel plot in this systematic review<sup>21</sup>.

## 252 **Conclusions**

253 To the best of our knowledge, this was the first meta-analysis that identified  
254  
255 omalizumab significantly improved endoscopic, clinical, and patient-reported  
256  
257 outcomes in moderate to severe CRSwNP and it was safe and well-tolerated. Studies  
258  
259 are required to evaluate their effectiveness in patients with less severe diseases and their  
260  
261 cost in the treatment.

## 262 **Acknowledgements**

263 N/A.

## 264 **Contributors**

265  
266  
267  
268  
269  
270  
271  
272  
273  
274  
275  
276  
277  
278  
279  
280  
281  
282  
283  
284  
285  
286  
287  
288  
289  
290  
291  
292  
293  
294  
295  
296  
297  
298  
299  
300  
301  
302  
303  
304  
305  
306  
307  
308  
309  
310  
311  
312  
313  
314  
315  
316  
317  
318  
319  
320  
321  
322  
323  
324  
325  
326  
327  
328  
329  
330  
331  
332  
333  
334  
335  
336  
337  
338  
339  
340  
341  
342  
343  
344  
345  
346  
347  
348  
349  
350  
351  
352  
353  
354  
355  
356  
357  
358  
359  
360  
361  
362  
363  
364  
365  
366  
367  
368  
369  
370  
371  
372  
373  
374  
375  
376  
377  
378  
379  
380  
381  
382  
383  
384  
385  
386  
387  
388  
389  
390  
391  
392  
393  
394  
395  
396  
397  
398  
399  
400  
401  
402  
403  
404  
405  
406  
407  
408  
409  
410  
411  
412  
413  
414  
415  
416  
417  
418  
419  
420  
421  
422  
423  
424  
425  
426  
427  
428  
429  
430  
431  
432  
433  
434  
435  
436  
437  
438  
439  
440  
441  
442  
443  
444  
445  
446  
447  
448  
449  
450  
451  
452  
453  
454  
455  
456  
457  
458  
459  
460  
461  
462  
463  
464  
465  
466  
467  
468  
469  
470  
471  
472  
473  
474  
475  
476  
477  
478  
479  
480  
481  
482  
483  
484  
485  
486  
487  
488  
489  
490  
491  
492  
493  
494  
495  
496  
497  
498  
499  
500  
501  
502  
503  
504  
505  
506  
507  
508  
509  
510  
511  
512  
513  
514  
515  
516  
517  
518  
519  
520  
521  
522  
523  
524  
525  
526  
527  
528  
529  
530  
531  
532  
533  
534  
535  
536  
537  
538  
539  
540  
541  
542  
543  
544  
545  
546  
547  
548  
549  
550  
551  
552  
553  
554  
555  
556  
557  
558  
559  
560  
561  
562  
563  
564  
565  
566  
567  
568  
569  
570  
571  
572  
573  
574  
575  
576  
577  
578  
579  
580  
581  
582  
583  
584  
585  
586  
587  
588  
589  
590  
591  
592  
593  
594  
595  
596  
597  
598  
599  
600

261 Concept and design: R Zheng and Q.T Yang. Acquisition, analysis, or interpretation of  
262 data: Q.W Wu, L.X Yuan, H.J Qiu, X.Y Wang, and X.K Huang. Drafting of the  
263 manuscript: Q.W Wu and L.X Yuan. Critical revision of the manuscript for important

1  
2  
3  
4 264 intellectual content: R Zheng and Q.T Yang. Statistical analysis: L.X Yuan. Supervision:

5  
6  
7 265 R Zheng and Q.T Yang.

8  
9  
10 266 **Funding**

11  
12  
13  
14 267 This work was supported by the National Natural Science Foundation of China (No.

15  
16 268 U20A20399 and 81870704), the Key-area Research and Development Program of

17  
18  
19 269 Guangdong Province (No.2020B0101130015), Sun Yat-sen University Clinical

20  
21  
22 270 Research 5010 Program (No. 2019006), the China Postdoctoral Science Foundation

23  
24  
25 271 Grant (2019M653207), Guangdong Basic and Applied Basic Research Foundation

26  
27  
28 272 (2020A1515010133), and the Medical Scientific Research Foundation of Guangdong

29  
30  
31 273 Province of China (A2019037).

32  
33  
34 274 **Competing interests**

35  
36  
37 275 No potential conflict of interest was reported by the authors.

38  
39  
40  
41 276 **Patient consent for publication**

42  
43  
44 277 Not required.

45  
46  
47  
48 278 **Patient and public involvement**

49  
50  
51 279 No patients were involved in the development of the research question, selection of the

52  
53  
54 280 outcome measures, design and implementation of the study, or interpretation of the

55  
56  
57 281 results.

1  
2  
3  
4 282 **Provenance and peer review**  
5

6  
7 283 Not commissioned; externally peer reviewed.  
8  
9

10  
11 284 **Data availability statement**  
12

13  
14 285 All data relevant to the study are included in the article or uploaded as supplementary  
15

16  
17 286 information.  
18  
19

20  
21 287 **ORCID**  
22

23  
24 288 Qingwu Wu, <https://orcid.org/0000-0003-0943-2558>.  
25

26  
27 289 Qintai Yang, <https://orcid.org/0000-0003-3377-737X>.  
28  
29  
30  
31  
32  
33  
34  
35  
36  
37  
38  
39  
40  
41  
42  
43  
44  
45  
46  
47  
48  
49  
50  
51  
52  
53  
54  
55  
56  
57  
58  
59  
60



291 **References**

- 292 1. Fokkens WJ, Lund VJ, Hopkins C, et al. European Position Paper on Rhinosinusitis  
293 and Nasal Polyps 2020. *Rhinology* 2020; 58. DOI: 10.4193/Rhin20.600.
- 294 2. Benjamin MR, Stevens WW, Li N, et al. Clinical Characteristics of Patients with  
295 Chronic Rhinosinusitis without Nasal Polyps in an Academic Setting. *J Allergy Clin*  
296 *Immunol Pract* 2019; 7: 1010-1016. DOI: 10.1016/j.jaip.2018.10.014.
- 297 3. Bachert C, Zhang L and Gevaert P. Current and future treatment options for adult  
298 chronic rhinosinusitis: Focus on nasal polyposis. *The Journal of allergy and clinical*  
299 *immunology* 2015; 136: 1431-1440. DOI: 10.1016/j.jaci.2015.10.010.
- 300 4. Khan A, Huynh TMT, Vandeplas G, et al. The GALEN rhinosinusitis cohort:  
301 chronic rhinosinusitis with nasal polyps affects health-related quality of life. *Rhinology*  
302 2019; 57: 343-351. DOI: 10.4193/Rhin19.158.
- 303 5. Rudmik L. Economics of Chronic Rhinosinusitis. *Curr Allergy Asthma Rep* 2017;  
304 17: 20. DOI: 10.1007/s11882-017-0690-5.
- 305 6. Stevens WW, Schleimer RP and Kern RC. Chronic Rhinosinusitis with Nasal  
306 Polyps. *J Allergy Clin Immunol Pract* 2016; 4: 565-572. DOI:  
307 10.1016/j.jaip.2016.04.012.
- 308 7. Tokunaga T, Sakashita M, Haruna T, et al. Novel scoring system and algorithm for  
309 classifying chronic rhinosinusitis: the JESREC Study. *Allergy* 2015; 70. DOI:  
310 10.1111/all.12644.
- 311 8. DeConde AS, Mace JC, Levy JM, et al. Prevalence of polyp recurrence after  
312 endoscopic sinus surgery for chronic rhinosinusitis with nasal polyposis. *Laryngoscope*  
313 2017; 127: 550-555. DOI: 10.1002/lary.26391.
- 314 9. Calus L, Van Bruaene N, Bosteels C, et al. Twelve-year follow-up study after  
315 endoscopic sinus surgery in patients with chronic rhinosinusitis with nasal polyposis.  
316 *Clin Transl Allergy* 2019; 9: 30. DOI: 10.1186/s13601-019-0269-4.
- 317 10. Pinto JM, Mehta N, DeTineo M, et al. A randomized, double-blind, placebo-  
318 controlled trial of anti-IgE for chronic rhinosinusitis. *Rhinology* 2010; 48: 318-324.  
319 DOI: 10.4193/Rhin09.144.
- 320 11. Gevaert P, Calus L, Van Zele T, et al. Omalizumab is effective in allergic and  
321 nonallergic patients with nasal polyps and asthma. *J Allergy Clin Immunol* 2013; 131:  
322 110-116.e111. 2012/10/02. DOI: 10.1016/j.jaci.2012.07.047.
- 323 12. Hong CJ, Tsang AC, Quinn JG, et al. Anti-IgE monoclonal antibody therapy for  
324 the treatment of chronic rhinosinusitis: a systematic review. *Syst Rev* 2015; 4: 166. DOI:  
325 10.1186/s13643-015-0157-5.
- 326 13. Chong L-Y, Piroomchai P, Sharp S, et al. Biologics for chronic rhinosinusitis.  
327 *Cochrane Database Syst Rev* 2020; 2: CD013513. DOI:  
328 10.1002/14651858.CD013513.pub2.
- 329 14. Gevaert P, Omachi TA, Corren J, et al. Efficacy and safety of omalizumab in nasal  
330 polyposis: two randomized phase III trials. *Journal of allergy and clinical immunology*  
331 2020. Journal Article.
- 332 15. Qingwu Wu, Rui Zheng, Huijun Qiu, et al. Anti-IgE monoclonal antibody in the

- 1  
2  
3 333 treatment of chronic rhinosinusitis with nasal polyps. PROSPERO 2020  
4 334 CRD42020207639 Available from:  
5 335 [https://www.crd.york.ac.uk/prospero/display\\_record.php?ID=CRD42020207639](https://www.crd.york.ac.uk/prospero/display_record.php?ID=CRD42020207639).  
6  
7 336 16. Moher D, Liberati A, Tetzlaff J, et al. Preferred reporting items for systematic  
8 337 reviews and meta-analyses: the PRISMA statement. *Ann Intern Med* 2009; 151.  
9  
10 338 17. Chowdhury NI, Mace JC, Bodner TE, et al. Investigating the minimal clinically  
11 339 important difference for SNOT-22 symptom domains in surgically managed chronic  
12 340 rhinosinusitis. *Int Forum Allergy Rhinol* 2017; 7: 1149-1155. 2017/10/21. DOI:  
13 341 10.1002/alr.22028.  
14  
15 342 18. NCT01066104. Subcutaneous omalizumab for treatment of chronic rhinosinusitis  
16 343 with nasal polyposis. [https:// clinicaltrials.gov/show/nct01066104](https://clinicaltrials.gov/show/nct01066104) 2009. [CRS:  
17 344 1647960].  
18  
19 345 19. John Staniorski C, Price CPE, Weibman AR, et al. Asthma onset pattern and patient  
20 346 outcomes in a chronic rhinosinusitis population. *International forum of allergy &*  
21 347 *rhinology* 2018; 8: 495-503. DOI: 10.1002/alr.22064.  
22  
23 348 20. Hopkins C, Gillett S, Slack R, et al. Psychometric validity of the 22-item Sinonasal  
24 349 Outcome Test. *Clin Otolaryngol* 2009; 34: 447-454. DOI: 10.1111/j.1749-  
25 350 4486.2009.01995.x.  
26  
27 351 21. Higgins JPT, Green S (editors). *Cochrane Handbook for Systematic Reviews of*  
28 352 *Interventions* Version 5.1.0 [updated March 2011]. The Cochrane Collaboration, 2011.  
29 353 Available from [www.cochrane-handbook.org](http://www.cochrane-handbook.org).  
30  
31  
32 354  
33  
34  
35  
36  
37  
38  
39  
40  
41  
42  
43  
44  
45  
46  
47  
48  
49  
50  
51  
52  
53  
54  
55  
56  
57  
58  
59  
60

355 **Appendix 1.** Search strategies

| <b>PubMed</b>                                                                                                                                                                                                                                                     |
|-------------------------------------------------------------------------------------------------------------------------------------------------------------------------------------------------------------------------------------------------------------------|
| 1. nasal polyps[MeSH Terms]                                                                                                                                                                                                                                       |
| 2. (((nasal polyp*[Title/Abstract]) OR (nasal papilloma[Title/Abstract])) OR (nose polyp*[Title/Abstract])) OR (nasi papilloma[Title/Abstract])) OR (nasi polyposis[Title/Abstract])                                                                              |
| 3. #1 OR #2                                                                                                                                                                                                                                                       |
| 4. sinusitis[MeSH Terms]                                                                                                                                                                                                                                          |
| 5. ((((((chronic rhinosinusitis[Title/Abstract]) OR (rhinopolyp*[Title/Abstract])) OR (CRSwNP[Title/Abstract])) OR (sinus Infection*[Title/Abstract])) OR (rhinitis[Title/Abstract])) OR (pansinusitis[Title/Abstract])) OR (sphenoid* sinusitis[Title/Abstract]) |
| 6. #4 OR #5                                                                                                                                                                                                                                                       |
| 7. omalizumab[MeSH Terms]                                                                                                                                                                                                                                         |
| 8. (((Xolair[Title/Abstract]) OR (anti-IgE antibody[Title/Abstract])) OR (anti-IgE monoclonal antibody[Title/Abstract])) OR (anti-IgE mAb[Title/Abstract])                                                                                                        |
| 9. #7 OR #8                                                                                                                                                                                                                                                       |
| 10. #3 OR #6                                                                                                                                                                                                                                                      |
| 11. #9 AND #10                                                                                                                                                                                                                                                    |
| <b>Cochrane Library</b>                                                                                                                                                                                                                                           |
| 1. MeSH descriptor: [Nasal Polyps] explode all trees                                                                                                                                                                                                              |
| 2. (nasal polyp*):ti,ab,kw OR (nasal papilloma):ti,ab,kw OR (nose polyp*):ti,ab,kw OR (nasi papilloma):ti,ab,kw OR (nasi polyposis):ti,ab,kw (Word variations have been searched)                                                                                 |
| 3. #1 OR #2                                                                                                                                                                                                                                                       |
| 4. MeSH descriptor: [Sinusitis] explode all trees                                                                                                                                                                                                                 |
| 5. (chronic rhinosinusitis):ti,ab,kw OR (rhinopolyp*):ti,ab,kw OR (CRSwNP):ti,ab,kw OR (sinus infection*):ti,ab,kw OR (rhinitis):ti,ab,kw (Word variations have been searched)                                                                                    |
| 6. #4 OR #5                                                                                                                                                                                                                                                       |
| 7. (pansinusitis):ti,ab,kw OR (sphenoid* sinusitis):ti,ab,kw (Word variations have been searched)                                                                                                                                                                 |
| 8. #6 OR #7                                                                                                                                                                                                                                                       |
| 9. MeSH descriptor: [Omalizumab] explode all trees                                                                                                                                                                                                                |
| 10. (Xolair):ti,ab,kw OR (anti-IgE antibody):ti,ab,kw OR (anti-IgE monoclonal antibody):ti,ab,kw OR (anti-IgE mAb):ti,ab,kw (Word variations have been searched)                                                                                                  |
| 11. #9 OR #10                                                                                                                                                                                                                                                     |
| 12. #3 OR #8                                                                                                                                                                                                                                                      |
| 13. #11 AND #12                                                                                                                                                                                                                                                   |
| <b>Embase</b>                                                                                                                                                                                                                                                     |

1. 'nose polyp'/exp
2. 'nasal polyp\*' OR 'nasal papilloma'/exp OR 'nasal papilloma' OR 'nose polyp\*' OR 'nasi papilloma' OR 'nasi polyposis':ab,ti
3. #1 OR #2
4. 'sinusitis'/exp
5. 'chronic rhinosinusitis rhinopolyp\*' OR crswnp OR 'sinus infection\*' OR rhinitis OR pansinusitis OR 'sphenoid\* sinusitis':ab,ti
6. #4 OR #5
7. #3 OR #6
8. 'omalizumab'/exp
9. 'xolair' OR 'anti-ige antibody' OR 'anti-ige monoclonal antibody' OR 'anti-ige mab':ab,ti
10. #8 OR #9
11. #7 AND #10
12. #7 AND #10 AND [medline]/lim
13. #11 NOT #12

#### Web of Science

1. TOPIC: (nasal polyp\*) OR TOPIC: (nasal papilloma) OR TOPIC: (nose polyp\*) OR TOPIC: (nasi papilloma) OR TOPIC: (nasi polyposis)
2. TOPIC: (sinusitis) OR TOPIC: (chronic rhinosinusitis) OR TOPIC: (rhinopolyp\*) OR TOPIC: (CRSwNP) OR TOPIC: (sinus Infection\*) OR TOPIC: (rhinitis) OR TOPIC: (pansinusitis) OR TOPIC: (sphenoid\* sinusitis)
3. #1 OR #2
4. TOPIC: (omalizumab) OR TOPIC: (Xolair) OR TOPIC: (anti-IgE antibody) OR TOPIC: (anti-IgE monoclonal antibody) OR TOPIC: (anti-IgE mAb)
5. #3 AND #4

356

1  
2  
3  
4 357 **Figure 1.** PRISMA flow diagram of the literature search.  
5

6  
7 358 **Figure 2.** ‘Risk of bias’ graph: review authors’ judgements about each risk of bias item  
8  
9 359 presented as percentages across all included studies.  
10

11  
12 360 **Figure 3.** ‘Risk of bias’ summary: review authors’ judgements about each risk of bias  
13  
14 361 item for each included study.  
15

16  
17 362 **Figure 4.** Meta-analyses of omalizumab versus placebo, comparing efficacy and safety.  
18  
19 363 Outcomes assessed are: (A) Nasal polyps score (NPS), (B) Nasal congestion score  
20  
21 364 (NCS), (C) Sino-Nasal Outcome Test-22 (SNOT-22), and (D) Total nasal symptom  
22  
23 365 score (TNSS).  
24  
25  
26  
27

28 366 **Figure 5.** Meta-analyses of omalizumab versus placebo, comparing efficacy and safety.  
29  
30 367 Outcomes assessed are: (A) Serious adverse events (SAEs), (B) Adverse events (AEs),  
31  
32 368 (C) Rescue systemic corticosteroid (RSCS), and (D) Reduced need for surgery (RNS).  
33  
34  
35  
36  
37  
38  
39  
40  
41  
42  
43  
44  
45  
46  
47  
48  
49  
50  
51  
52  
53  
54  
55  
56  
57  
58  
59  
60

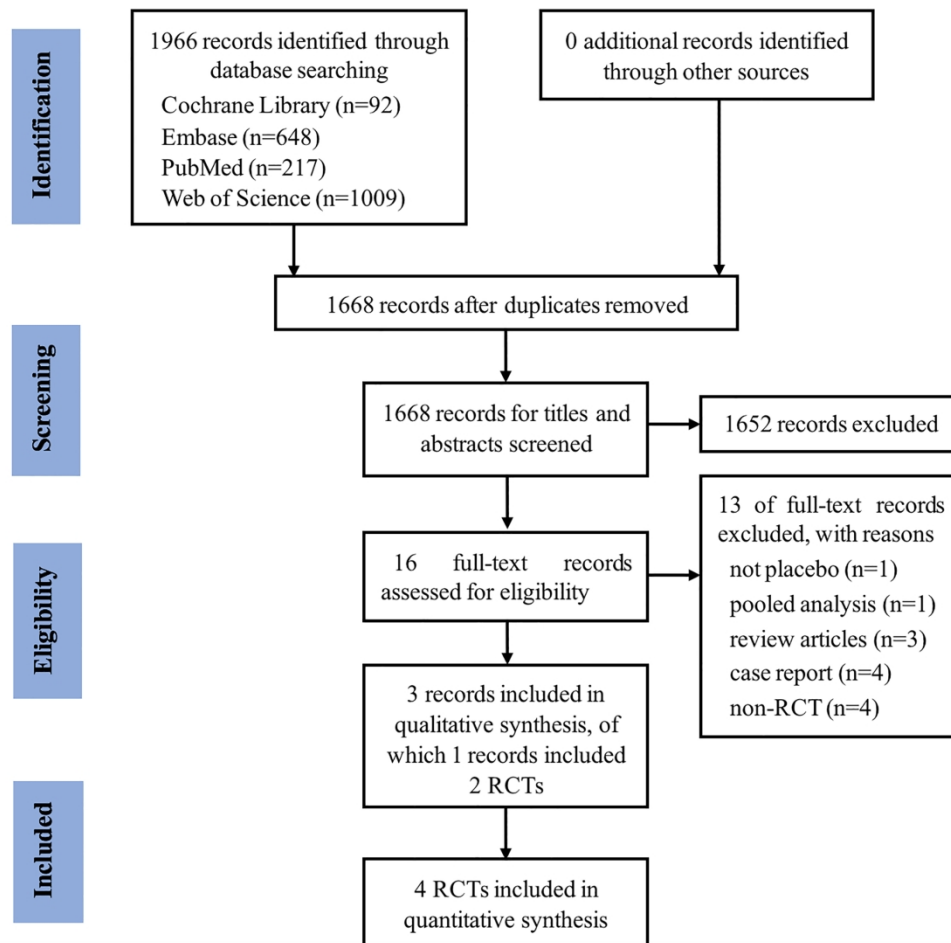

37  
38  
39  
40  
41  
42  
43  
44  
45  
46  
47  
48  
49  
50  
51  
52  
53  
54  
55  
56  
57  
58  
59  
60

Figure 1. PRISMA flow diagram of the literature search.

231x220mm (300 x 300 DPI)

1  
2  
3  
4  
5  
6  
7  
8  
9  
10  
11  
12  
13  
14  
15  
16  
17  
18  
19  
20  
21  
22  
23  
24  
25  
26  
27  
28  
29  
30  
31  
32  
33  
34  
35  
36  
37  
38  
39  
40  
41  
42  
43  
44  
45  
46  
47  
48  
49  
50  
51  
52  
53  
54  
55  
56  
57  
58  
59  
60

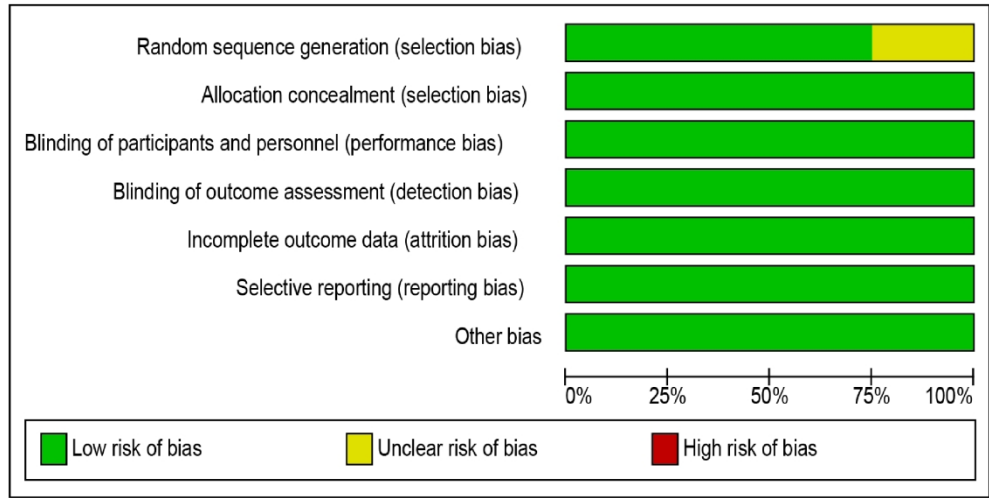

Figure 2. 'Risk of bias' graph: review authors' judgements about each risk of bias item presented as percentages across all included studies.

209x107mm (300 x 300 DPI)

1  
2  
3  
4  
5  
6  
7  
8  
9  
10  
11  
12  
13  
14  
15  
16  
17  
18  
19  
20  
21  
22  
23  
24  
25  
26  
27  
28  
29  
30  
31  
32  
33  
34  
35  
36  
37  
38  
39  
40  
41  
42  
43  
44  
45  
46  
47  
48  
49  
50  
51  
52  
53  
54  
55  
56  
57  
58  
59  
60

|              | Random sequence generation (selection bias) | Allocation concealment (selection bias) | Blinding of participants and personnel (performance bias) | Blinding of outcome assessment (detection bias) | Incomplete outcome data (attrition bias) | Selective reporting (reporting bias) | Other bias |
|--------------|---------------------------------------------|-----------------------------------------|-----------------------------------------------------------|-------------------------------------------------|------------------------------------------|--------------------------------------|------------|
| Gevaert 2013 | +                                           | +                                       | +                                                         | +                                               | +                                        | +                                    | +          |
| Pinto 2010   | ?                                           | +                                       | +                                                         | +                                               | +                                        | +                                    | +          |
| POLYP1 2020  | +                                           | +                                       | +                                                         | +                                               | +                                        | +                                    | +          |
| POLYP2 2020  | +                                           | +                                       | +                                                         | +                                               | +                                        | +                                    | +          |

Figure 3. 'Risk of bias' summary: review authors' judgements about each risk of bias item for each included study.

107x204mm (300 x 300 DPI)



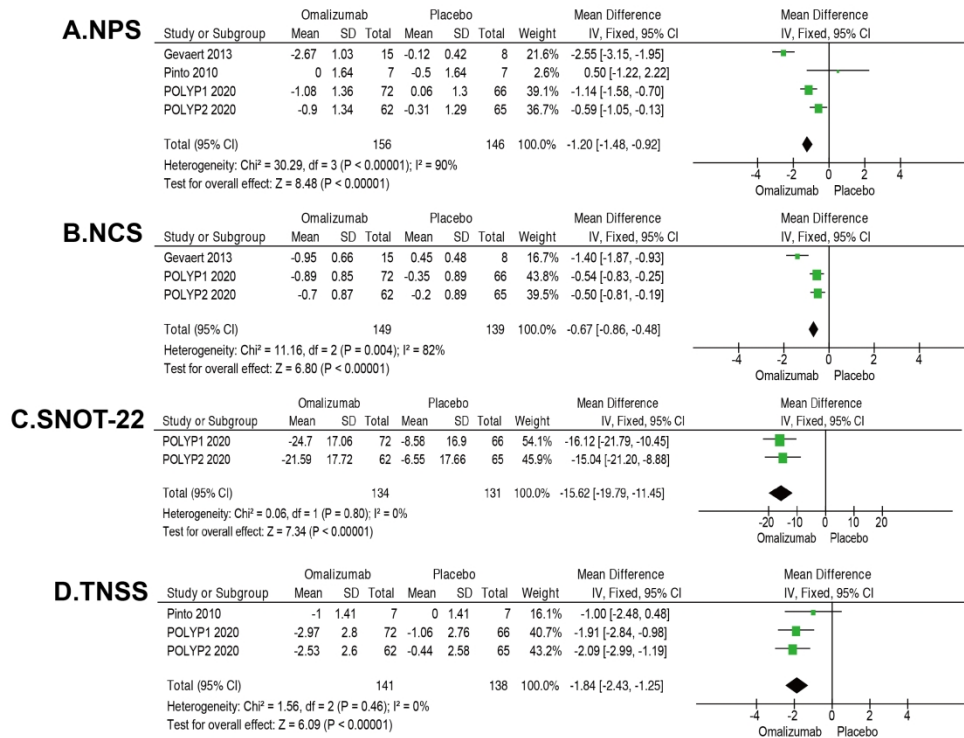

Figure 4. Meta-analyses of omalizumab versus placebo, comparing efficacy and safety. Outcomes assessed are: (A) Nasal polyps score (NPS), (B) Nasal congestion score (NCS), (C) Sino-Nasal Outcome Test-22 (SNOT-22), and (D) Total nasal symptom score (TNSS).

244x184mm (300 x 300 DPI)

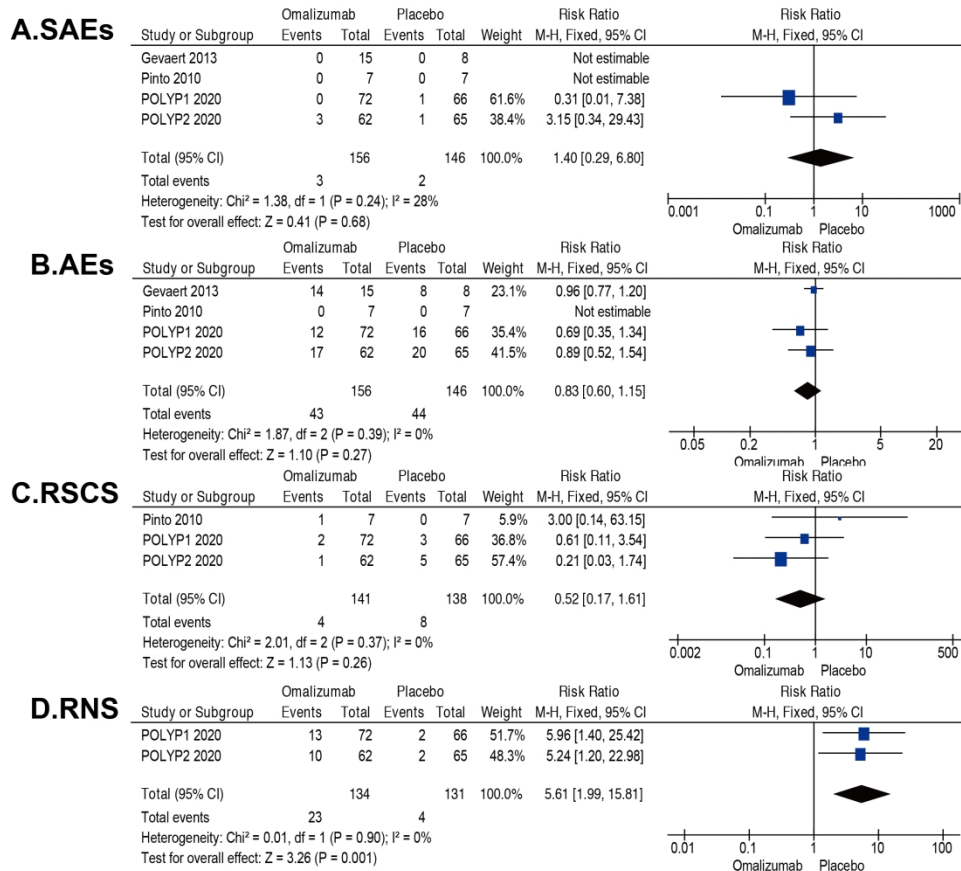

Figure 5. Meta-analyses of omalizumab versus placebo, comparing efficacy and safety. Outcomes assessed are: (A) Serious adverse events (SAEs), (B) Adverse events (AEs), (C) Rescue systemic corticosteroid (RSCS), and (D) Reduced need for surgery (RNS).

220x203mm (300 x 300 DPI)

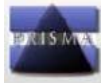

# PRISMA 2009 Checklist

| Section/topic                      | #  | Checklist item                                                                                                                                                                                                                                                                                              | Reported on page # |
|------------------------------------|----|-------------------------------------------------------------------------------------------------------------------------------------------------------------------------------------------------------------------------------------------------------------------------------------------------------------|--------------------|
| <b>TITLE</b>                       |    |                                                                                                                                                                                                                                                                                                             |                    |
| Title                              | 1  | Identify the report as a systematic review, meta-analysis, or both.                                                                                                                                                                                                                                         | 1                  |
| <b>ABSTRACT</b>                    |    |                                                                                                                                                                                                                                                                                                             |                    |
| Structured summary                 | 2  | Provide a structured summary including, as applicable: background; objectives; data sources; study eligibility criteria, participants, and interventions; study appraisal and synthesis methods; results; limitations; conclusions and implications of key findings; systematic review registration number. | 2-3                |
| <b>INTRODUCTION</b>                |    |                                                                                                                                                                                                                                                                                                             |                    |
| Rationale                          | 3  | Describe the rationale for the review in the context of what is already known.                                                                                                                                                                                                                              | 4                  |
| Objectives                         | 4  | Provide an explicit statement of questions being addressed with reference to participants, interventions, comparisons, outcomes, and study design (PICOS).                                                                                                                                                  | 4                  |
| <b>METHODS</b>                     |    |                                                                                                                                                                                                                                                                                                             |                    |
| Protocol and registration          | 5  | Indicate if a review protocol exists, if and where it can be accessed (e.g., Web address), and, if available, provide registration information including registration number.                                                                                                                               | 5                  |
| Eligibility criteria               | 6  | Specify study characteristics (e.g., PICOS, length of follow-up) and report characteristics (e.g., years considered, language, publication status) used as criteria for eligibility, giving rationale.                                                                                                      | 5                  |
| Information sources                | 7  | Describe all information sources (e.g., databases with dates of coverage, contact with study authors to identify additional studies) in the search and date last searched.                                                                                                                                  | 5                  |
| Search                             | 8  | Present full electronic search strategy for at least one database, including any limits used, such that it could be repeated.                                                                                                                                                                               | 5                  |
| Study selection                    | 9  | State the process for selecting studies (i.e., screening, eligibility, included in systematic review, and, if applicable, included in the meta-analysis).                                                                                                                                                   | 5                  |
| Data collection process            | 10 | Describe method of data extraction from reports (e.g., piloted forms, independently, in duplicate) and any processes for obtaining and confirming data from investigators.                                                                                                                                  | 5-6                |
| Data items                         | 11 | List and define all variables for which data were sought (e.g., PICOS, funding sources) and any assumptions and simplifications made.                                                                                                                                                                       | 6                  |
| Risk of bias in individual studies | 12 | Describe methods used for assessing risk of bias of individual studies (including specification of whether this was done at the study or outcome level), and how this information is to be used in any data synthesis.                                                                                      | 6                  |
| Summary measures                   | 13 | State the principal summary measures (e.g., risk ratio, difference in means).                                                                                                                                                                                                                               | 6-7                |
| Synthesis of results               | 14 | Describe the methods of handling data and combining results of studies, if done, including measures of consistency (e.g., $I^2$ ) for each meta-analysis.                                                                                                                                                   | 6-7                |

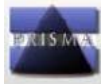

# PRISMA 2009 Checklist

Page 1 of 2

| Section/topic                 | #  | Checklist item                                                                                                                                                                                           | Reported on page #     |
|-------------------------------|----|----------------------------------------------------------------------------------------------------------------------------------------------------------------------------------------------------------|------------------------|
| Risk of bias across studies   | 15 | Specify any assessment of risk of bias that may affect the cumulative evidence (e.g., publication bias, selective reporting within studies).                                                             | n/a                    |
| Additional analyses           | 16 | Describe methods of additional analyses (e.g., sensitivity or subgroup analyses, meta-regression), if done, indicating which were pre-specified.                                                         | n/a                    |
| <b>RESULTS</b>                |    |                                                                                                                                                                                                          |                        |
| Study selection               | 17 | Give numbers of studies screened, assessed for eligibility, and included in the review, with reasons for exclusions at each stage, ideally with a flow diagram.                                          | 8, Figure 1            |
| Study characteristics         | 18 | For each study, present characteristics for which data were extracted (e.g., study size, PICOS, follow-up period) and provide the citations.                                                             | 8, Table 1             |
| Risk of bias within studies   | 19 | Present data on risk of bias of each study and, if available, any outcome level assessment (see item 12).                                                                                                | 10; Figure 2 and 3     |
| Results of individual studies | 20 | For all outcomes considered (benefits or harms), present, for each study: (a) simple summary data for each intervention group (b) effect estimates and confidence intervals, ideally with a forest plot. | 11-12; Figure 4 and 5  |
| Synthesis of results          | 21 | Present results of each meta-analysis done, including confidence intervals and measures of consistency.                                                                                                  | 11-12; Figure 4 and 5. |
| Risk of bias across studies   | 22 | Present results of any assessment of risk of bias across studies (see Item 15).                                                                                                                          | n/a                    |
| Additional analysis           | 23 | Give results of additional analyses, if done (e.g., sensitivity or subgroup analyses, meta-regression [see Item 16]).                                                                                    | n/a                    |
| <b>DISCUSSION</b>             |    |                                                                                                                                                                                                          |                        |
| Summary of evidence           | 24 | Summarize the main findings including the strength of evidence for each main outcome; consider their relevance to key groups (e.g., healthcare providers, users, and policy makers).                     | 13-14                  |
| Limitations                   | 25 | Discuss limitations at study and outcome level (e.g., risk of bias), and at review-level (e.g., incomplete retrieval of identified research, reporting bias).                                            | 14-15                  |
| Conclusions                   | 26 | Provide a general interpretation of the results in the context of other evidence, and implications for future research.                                                                                  | 15                     |
| <b>FUNDING</b>                |    |                                                                                                                                                                                                          |                        |

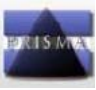

# PRISMA 2009 Checklist

1  
2  
3  
4  
5  
6  
7  
8  
9  
10  
11  
12  
13  
14  
15  
16  
17  
18  
19  
20  
21  
22  
23  
24  
25  
26  
27  
28  
29  
30  
31  
32  
33  
34  
35  
36  
37  
38  
39  
40  
41  
42  
43  
44  
45  
46  
47

|         |    |                                                                                                                                            |    |
|---------|----|--------------------------------------------------------------------------------------------------------------------------------------------|----|
| Funding | 27 | Describe sources of funding for the systematic review and other support (e.g., supply of data); role of funders for the systematic review. | 16 |
|---------|----|--------------------------------------------------------------------------------------------------------------------------------------------|----|

From: Moher D, Liberati A, Tetzlaff J, Altman DG, The PRISMA Group (2009). Preferred Reporting Items for Systematic Reviews and Meta-Analyses: The PRISMA Statement. PLoS Med 6(6): e1000097. doi:10.1371/journal.pmed1000097

For more information, visit: [www.prisma-statement.org](http://www.prisma-statement.org).

Page 2 of 2

For peer review only

# BMJ Open

## Efficacy and safety of omalizumab in chronic rhinosinusitis with nasal polyps: a systematic review and meta-analysis of randomized controlled trials

|                                 |                                                                                                                                                                                                                                                                                                                                                                                                                                                                                                                                                                                                                                                                                                                                                                                                                    |
|---------------------------------|--------------------------------------------------------------------------------------------------------------------------------------------------------------------------------------------------------------------------------------------------------------------------------------------------------------------------------------------------------------------------------------------------------------------------------------------------------------------------------------------------------------------------------------------------------------------------------------------------------------------------------------------------------------------------------------------------------------------------------------------------------------------------------------------------------------------|
| Journal:                        | <i>BMJ Open</i>                                                                                                                                                                                                                                                                                                                                                                                                                                                                                                                                                                                                                                                                                                                                                                                                    |
| Manuscript ID                   | bmjopen-2020-047344.R2                                                                                                                                                                                                                                                                                                                                                                                                                                                                                                                                                                                                                                                                                                                                                                                             |
| Article Type:                   | Original research                                                                                                                                                                                                                                                                                                                                                                                                                                                                                                                                                                                                                                                                                                                                                                                                  |
| Date Submitted by the Author:   | 28-Jul-2021                                                                                                                                                                                                                                                                                                                                                                                                                                                                                                                                                                                                                                                                                                                                                                                                        |
| Complete List of Authors:       | Wu, Qingwu; Third Affiliated Hospital of Sun Yat-Sen University, Department of Otorhinolaryngology-Head and Neck Surgery<br>Yuan, Lianxiong; Third Affiliated Hospital of Sun Yat-Sen University, Department of Science and Research<br>Qiu, Huijun; Third Affiliated Hospital of Sun Yat-Sen University<br>Wang, Xinyue; Third Affiliated Hospital of Sun Yat-Sen University, Otorhinolaryngology-Head and Neck Surgery<br>Huang, Xue-Kun; Third Affiliated Hospital of Sun Yat-Sen University, Department of Otorhinolaryngology-Head and Neck Surgery<br>Zheng, Rui; Third Affiliated Hospital of Sun Yat-Sen University, Department of Otorhinolaryngology-Head and Neck Surgery<br>Yang, Qintai; Third Affiliated Hospital of Sun Yat-Sen University, Department of Otorhinolaryngology-Head and Neck Surgery |
| <b>Primary Subject Heading</b>: | Ear, nose and throat/otolaryngology                                                                                                                                                                                                                                                                                                                                                                                                                                                                                                                                                                                                                                                                                                                                                                                |
| Secondary Subject Heading:      | Ear, nose and throat/otolaryngology                                                                                                                                                                                                                                                                                                                                                                                                                                                                                                                                                                                                                                                                                                                                                                                |
| Keywords:                       | Adult otolaryngology < OTOLARYNGOLOGY, Endoscopic surgery < OTOLARYNGOLOGY, Adverse events < THERAPEUTICS, Clinical trials < THERAPEUTICS                                                                                                                                                                                                                                                                                                                                                                                                                                                                                                                                                                                                                                                                          |
|                                 |                                                                                                                                                                                                                                                                                                                                                                                                                                                                                                                                                                                                                                                                                                                                                                                                                    |

SCHOLARONE™  
Manuscripts



I, the Submitting Author has the right to grant and does grant on behalf of all authors of the Work (as defined in the below author licence), an exclusive licence and/or a non-exclusive licence for contributions from authors who are: i) UK Crown employees; ii) where BMJ has agreed a CC-BY licence shall apply, and/or iii) in accordance with the terms applicable for US Federal Government officers or employees acting as part of their official duties; on a worldwide, perpetual, irrevocable, royalty-free basis to BMJ Publishing Group Ltd ("BMJ") its licensees and where the relevant Journal is co-owned by BMJ to the co-owners of the Journal, to publish the Work in this journal and any other BMJ products and to exploit all rights, as set out in our [licence](#).

The Submitting Author accepts and understands that any supply made under these terms is made by BMJ to the Submitting Author unless you are acting as an employee on behalf of your employer or a postgraduate student of an affiliated institution which is paying any applicable article publishing charge ("APC") for Open Access articles. Where the Submitting Author wishes to make the Work available on an Open Access basis (and intends to pay the relevant APC), the terms of reuse of such Open Access shall be governed by a Creative Commons licence – details of these licences and which [Creative Commons](#) licence will apply to this Work are set out in our licence referred to above.

Other than as permitted in any relevant BMJ Author's Self Archiving Policies, I confirm this Work has not been accepted for publication elsewhere, is not being considered for publication elsewhere and does not duplicate material already published. I confirm all authors consent to publication of this Work and authorise the granting of this licence.

1 **Efficacy and safety of omalizumab in chronic rhinosinusitis with nasal polyps:**  
2 **a systematic review and meta-analysis of randomized controlled trials**

3 Qingwu Wu<sup>1,2\*</sup>, Lianxiong Yuan<sup>3\*</sup>, Huijun Qiu<sup>1\*</sup>, Xinyue Wang<sup>1</sup>, Xuekun  
4 Huang<sup>1</sup>, Rui Zheng<sup>1,2#</sup>, Qintai Yang<sup>1,2#</sup>

5 <sup>1</sup> Department of Otorhinolaryngology-Head and Neck Surgery, The Third Affiliated  
6 Hospital of Sun Yat-Sen University, Guangzhou 510630, China

7 <sup>2</sup> Department of Allergy, The Third Affiliated Hospital of Sun Yat-Sen University,  
8 Guangzhou 510630, China

9 <sup>3</sup> Department of Science and Research, The Third Affiliated Hospital of Sun Yat-Sen  
10 University, Guangzhou 510630, China

11 \*The authors contributed equally to this work.

12 #Corresponding author

13 Rui Zheng, MD and Qintai Yang, MD, PhD

14 Department of Otolaryngology-Head and Neck Surgery

15 The Third Affiliated Hospital of Sun Yat-Sen University

16 No. 600 Tianhe Road, Guangzhou 510630, China

17 Phone: 020-85252239

18 E-mail: zhengr8@mail.sysu.edu.cn and yangqint@mail.sysu.edu.cn

19



1  
2  
3  
4     20    **Abstract**

5  
6  
7     21    **Objectives**

8  
9     22    To assess the efficacy and safety of omalizumab for chronic rhinosinusitis with nasal  
10  
11  
12    23    polyps (CRSwNP) and to identify evidence gaps that will guide future research on  
13  
14  
15    24    omalizumab for CRSwNP.

16  
17    25    **Design**

18  
19  
20    26    Systematic review and meta-analysis.

21  
22  
23    27    **Data Sources**

24  
25  
26    28    A comprehensive search was performed in PubMed, Embase, Web of Science, and the  
27  
28  
29    29    Cochrane Library on 13 October 2020.

30  
31    30    **Eligibility Criteria**

32  
33  
34    31    Randomized controlled trials (RCTs) comparing omalizumab with placebo, given for  
35  
36  
37    32    at least 16 weeks in adult patients with CRSwNP.

38  
39    33    **Data extraction and synthesis**

40  
41  
42    34    Two independent authors screened search results, extracted data and assessed studies  
43  
44  
45    35    using the Cochrane risk of bias tool. Data were pooled using the inverse-variance  
46  
47  
48    36    method and expressed as mean differences (MDs) with 95% CIs. Heterogeneity was  
49  
50  
51    37    assessed by the Chi<sup>2</sup> test and the I<sup>2</sup> statistic.

52  
53    38    **Results**

54  
55  
56    39    A total of 4 RCTs involving 303 participants were identified. When comparing  
57  
58  
59    40    omalizumab to placebo, there was a significant difference in nasal polyps score (mean  
60

1  
2  
3  
4 41 difference (MD) = -1.20; 95% confidence interval (CI), -1.48 to -0.92), nasal  
5  
6  
7 42 congestion score (MD = -0.67; 95% CI, -0.86 to -0.48), Sino-Nasal Outcome Test-22  
8  
9  
10 43 (MD = -15.62; 95% CI, -19.79 to -11.45), total nasal symptom score (MD = -1.84; 95%  
11  
12  
13 44 CI, -2.43 to -1.25), and reduced need for surgery (risk ratio (RR) = 5.61; 95% CI, 1.99  
14  
15 45 to 15.81). Furthermore, there was no difference in the risk of serious adverse events  
16  
17  
18 46 ((RR = 1.40; 95% CI, 0.29 to 6.80), adverse events (RR = 0.83; 95% CI, 0.60 to 1.15)  
19  
20  
21 47 and rescue systemic corticosteroid (RR = 0.52; 95% CI, 0.17 to 1.61).

## 22 23 48 **Conclusions**

24  
25  
26 49 This was the first meta-analysis that identified omalizumab significantly improved  
27  
28  
29 50 endoscopic, clinical, and patient-reported outcomes in adults with moderate to severe  
30  
31  
32 51 CRSwNP and it was safe and well-tolerated.

## 33 34 52 **PROSPERO registration number**

35  
36  
37 53 CRD42020207639.

38  
39  
40 54 **Keywords:** omalizumab; anti-IgE antibody; chronic rhinosinusitis; nasal polyps;  
41  
42 55 systematic review; meta-analysis

## 43 44 56 **Strengths and limitation of this study**

- 45  
46  
47 57 1. This systematic review and meta-analysis was based on a comprehensive search and  
48  
49  
50 58 included RCTs.  
51  
52  
53 59 2. Studies were low risk of bias, which was assessed by the Cochrane risk of bias tool.  
54  
55  
56 60 3. Because the longest follow-up of 4 RCTs was only up to 26 weeks, there were too  
57  
58  
59 61 short to comprehensively and adequately assess the risks of side effect.

## 62 Introduction

63 Chronic rhinosinusitis (CRS) is common and affects up to 5-12% of the general  
64 population<sup>1</sup>. It is defined as inflammation of the nose and the paranasal sinuses  
65 characterized by nasal congestion, nasal discharge, facial pressure, and loss of smell.  
66 CRS with nasal polyps (CRSwNP) is a severe form of CRS and accounts for 18% of  
67 patients with CRS<sup>2</sup>. CRSwNP is associated with adult-onset asthma, decreased health-  
68 related quality of life (HRQoL)<sup>3, 4</sup>, and substantial economic burden<sup>5</sup>. Many patients  
69 with CRSwNP often fail to achieve sufficient benefit from intranasal corticosteroids  
70 (INCS) or systemic corticosteroids (SCS) and/ or functional endoscopic sinus surgery  
71 (FESS)<sup>6</sup>. Although FESS may be successful initially, relapse occurs in 20% of patients  
72 after 12 months<sup>7</sup>, in 40% after 18 months<sup>8</sup>, and in 80% after 12 years despite ongoing  
73 INCS therapy<sup>9</sup>. Therefore, novel treatments such as biologics are needed for CRSwNP.  
74 Omalizumab (anti-IgE antibody) is one of the biologics and may help patients with  
75 severe CRSwNP. It was reported that omalizumab made their symptom better and  
76 shrank their polyps in small-size randomized controlled trials (RCTs)<sup>10, 11</sup>. But some of  
77 its effectiveness and safety are not well known. Thus, some systematic reviews were  
78 conducted to assess the effectiveness and safety of it. But they found very little  
79 information or insufficient evidence about the use of omalizumab and cannot determine  
80 whether it was effective or not<sup>12, 13</sup>. Currently, some well-designed RCTs about  
81 omalizumab for CRSwNP were published<sup>14</sup>, which may provide us with some evidence.  
82 Therefore, this systematic review was conducted to evaluate the efficacy and safety of

1  
2  
3  
4 83 omalizumab versus placebo in adult patients with CRSwNP, and identify evidence gaps  
5  
6  
7 84 that will guide future research on omalizumab for CRSwNP.  
8  
9

## 10 **Methods**

11  
12  
13 86 We performed a systematic review based on a priori protocol that was registered with  
14  
15 87 PROSPERO (No. CRD42020207639)<sup>15</sup>. This review was reported according to the  
16  
17  
18 88 Preferred Reporting Items for Systematic reviews and Meta-Analyses (PRISMA)  
19  
20  
21 89 statement<sup>16</sup> (Additional file 1).  
22  
23

## 24 **Eligibility criteria**

25  
26 91 (a) Population: adult patients (>18) with CRSwNP; (b) Intervention and comparison:  
27  
28  
29 92 studies comparing omalizumab with placebo, given for at least 16 weeks; (c) Primary  
30  
31  
32 93 outcomes: nasal polyps score, nasal congestion score, and Sino-Nasal Outcome Test-  
33  
34  
35 94 22 score; Secondary outcomes: total nasal symptom score, serious adverse events,  
36  
37  
38 95 adverse events, rescue systemic corticosteroid, and reduced need for surgery. (d)  
39  
40 96 Study design: randomized controlled trials (RCTs); (e) Studies written and published  
41  
42  
43 97 in the English language were included.  
44

## 45 **Search strategy and selection process**

46  
47  
48 99 A comprehensive search was performed in PubMed, Embase, Web of Science, and the  
49  
50  
51 100 Cochrane Library on 13 October 2020. We used the following combined text and  
52  
53  
54 101 MeSH terms: “nasal polyps”, “sinusitis” and “omalizumab”. Search strategies for major  
55  
56  
57 102 databases are provided in Appendix 1.  
58  
59 103 Titles and abstracts of the retrieved articles were then screened for their potential  
60

1  
2  
3  
4 104 relevance by two reviewers (Q.W Wu and L.X Yuan ). The full-text articles were  
5  
6  
7 105 obtained and assessed by the same reviewers to determine whether they met the  
8  
9  
10 106 inclusion criteria for this review. We resolved any differences by a discussion with a  
11  
12 107 third author (Q.T Yang).

### 15 108 **Data extraction**

16  
17 109 Two reviewers (H.J Qiu and X.Y Wang) read full-text articles and extracted data using  
18  
19  
20 110 a pre-defined extraction form. Data were extracted on the following: first author, year  
21  
22  
23 111 of publication, patient characteristics, study methods, and outcome data.

### 25 112 **Assessment of risk of bias**

26  
27  
28 113 In this review, the original version of the Cochrane 'Risk of bias' tool was used to assess  
29  
30  
31 114 the risk of bias in included studies. The risk of bias was assessed as 'low', 'high' or  
32  
33  
34 115 'unclear' for each of the following six domains: sequence generation; allocation  
35  
36  
37 116 concealment; blinding of participants, personnel and outcome assessment; incomplete  
38  
39  
40 117 outcome data; selective reporting; other sources of bias (if required).

### 42 118 **Statistical analysis**

43  
44  
45 119 Study characteristics were shown in tables and described narratively. For dichotomous  
46  
47  
48 120 data, we planned to analyze treatment differences as a risk ratio (RR) calculated using  
49  
50  
51 121 the Mantel-Haenszel methods. For continuous outcomes, a generic inverse-variance  
52  
53  
54 122 method with fixed-effects models was used to calculate pooled mean differences and  
55  
56  
57 123 95% confidence interval. Statistical heterogeneity was assessed by the Chi<sup>2</sup> test (with a  
58  
59  
60 124 significance level set at P value <0.10) and the I<sup>2</sup> statistic (I<sup>2</sup> ≥ 50% indicates

1  
2  
3  
4 125 substantial heterogeneity). There are two large pharma-sponsored RCTs with most of  
5  
6  
7 126 the information and two smaller RCTs with effect sizes much larger and much smaller  
8  
9  
10 127 than the two main studies. A random-effects meta-analysis may exacerbate the effects  
11  
12 128 of the bias and a fixed-effect analysis will be affected less, although strictly fixed-effect  
13  
14  
15 129 analysis will also be inappropriate.<sup>17</sup> Therefore, we choose a fixed-effect analysis in  
16  
17  
18 130 this study. Sensitivity analysis were performed, which included the removal of each  
19  
20  
21 131 single study from the meta-analysis one at a time and recalculation of the summary  
22  
23 132 effect. The possibility of publication bias was assessed by constructing a funnel plot if  
24  
25  
26 133 sufficient studies (>10) were available for an outcome. All meta-analysis were  
27  
28  
29 134 conducted by the Review Manager (version 5.3).

30  
31 135  
32  
33  
34  
35  
36  
37  
38  
39  
40  
41  
42  
43  
44  
45  
46  
47  
48  
49  
50  
51  
52  
53  
54  
55  
56  
57  
58  
59  
60

1  
2  
3  
4 136 **Results**

5  
6  
7 137 **Study selection**

8  
9 138 We identified 1966 studies, of which 3 (with data for 302 participants) were included  
10  
11  
12 139 in our analysis (Figure 1). The 3 studies (Pinto 2010<sup>10</sup>, Gevaert 2013<sup>11</sup>, and Gavaert  
13  
14  
15 140 2020<sup>14</sup>) were published between 2010 and 2020, of which Gavaert 2020 reported 2  
16  
17  
18 141 RCTs (POLYP1 2020 and POLYP2 2020).

19  
20 142 **Study characteristics**

21  
22  
23 143 A summary of key participant characteristics, interventions, and comparison pairs was  
24  
25  
26 144 shown in Table 1. Except for 2 participants in Pinto 2010, all the participants were  
27  
28  
29 145 adults with CRSwNP. All the studies were double-blind RCTs and used a placebo.  
30  
31 146 Study duration ranged from 20 weeks to 26 weeks.  
32  
33  
34  
35  
36  
37  
38  
39  
40  
41  
42  
43  
44  
45  
46  
47  
48  
49  
50  
51  
52  
53  
54  
55  
56  
57  
58  
59  
60

147 **Table 1.** Summary of characteristics of included RCTs

| Study, year                               | Population                                             | Comorbidity                                                                           | Omalizumab*    | Placebo                            | Treatment length | Follow-up length | Age (y), mean (Range) |              | Male, no.(%) |           |
|-------------------------------------------|--------------------------------------------------------|---------------------------------------------------------------------------------------|----------------|------------------------------------|------------------|------------------|-----------------------|--------------|--------------|-----------|
|                                           |                                                        |                                                                                       |                |                                    |                  |                  | Omalizumab            | Placebo      | Omalizumab   | Placebo   |
| Pinto 2010 <sup>10</sup><br>(n = 14)      | CRSwNP<br>(all had undergone endoscopic sinus surgery) | inhaled asthma therapy (72% (5/7) in omalizumab group and 43% (3/7) in placebo group) | subcutaneously | injection, same dose and frequency | 26 weeks         | 26 weeks         | 43.1 (18-75)          | 48.6 (18-75) | 3 (43%)      | 7 (100%)  |
| Gevaert <sup>11</sup><br>2013<br>(n = 24) | CRSwNP                                                 | asthma (100%)                                                                         | subcutaneously | injection, same dose and frequency | 16 weeks         | 20 weeks         | 50 (≥18)              | 45 (≥18)     | 12 (80%)     | 4 (50%)   |
| POLYP1 <sup>14</sup><br>2020<br>(n = 138) | CRSwNP                                                 | asthma (58.3% (42/72) in omalizumab group and 48.5% (32/66) in placebo group)         | subcutaneously | injection, same dose and frequency | 24 weeks         | 24 weeks         | 50.0 (18-75)          | 52.2 (18-75) | 47 (65.3)    | 41 (62.1) |
| POLYP2 <sup>14</sup><br>2020<br>(n = 127) | CRSwNP                                                 | asthma (61.3% (38/62) in omalizumab group and 60% (39/65) in placebo group)           | subcutaneously | injection, same dose and frequency | 24 weeks         | 24 weeks         | 49.0 (18-75)          | 51.0 (18-75) | 39 (62.9)    | 44 (67.7) |

148

\*omalizumab subcutaneously (every 2 week or every month injections), based on total serum IgE levels and body weight, with a maximum dose of 375 mg; CRSwNP: chronic rhinosinusitis with nasal polyps; RCTs: randomized controlled trials.



## 150 **Risk of bias and quality of the clinical trials**

151 There were 4 RCTs included in this review. Overall the risk of bias was low, except the  
152 random sequence generation of Pinto 2010 was unclear. Our judgments about each risk  
153 of bias item presented as percentages across all included studies were shown in Figure  
154 2. Our judgments about each risk of bias item for each included study were shown in  
155 Figure 3.

## 156 **Primary outcomes**

157 Total nasal polyps score (NPS) ranges from 0 to 8 (sum of 0-4 for left and right nasal  
158 passage scores per participant), with a lower score indicating smaller-sized nasal polyps  
159 and the highest score indicating large polyps causing complete obstruction of the  
160 inferior nasal cavity.

161 The mean difference (MD) in the change of NPS was -1.20 (95% confidence interval  
162 (CI), -1.48 to -0.92; 4 RCTs; 302 participants;  $I^2 = 90\%$ ; Figure 4A). We noted the high  
163  $I^2$  value and Pinto 2020 had no significant reduction in NPS. However, the removal of  
164 Pinto 2020 did not change the overall effect size in sensitivity analyses. Therefore, we  
165 considered the certainty of the evidence to be high despite the large  $I^2$  value.

166 Nasal congestion score (NCS) was assessed daily by the participant via an electronic  
167 diary as the response to the following question: Is your nose blocked? The four  
168 available response options were scored from 0 (no symptoms) to 3 (severe symptoms).  
169 The pooled mean difference of NCS is -0.67 favoring the groups receiving omalizumab  
170 (95% CI, -0.86 to -0.48; 3 RCTs; 288 participants;  $I^2 = 82\%$ ; Figure 4B). Although the

1  
2  
3  
4 171 heterogeneity was high in this analysis, all 3 RCTs showed a significant reduction in  
5  
6  
7 172 NCS with omalizumab.

8  
9 173 The mean difference in the change of Sino-Nasal Outcome Test-22 (SNOT-22) score  
10  
11  
12 174 was 15.62 points lower in participants who received omalizumab (MD = -15.62; 95%  
13  
14  
15 175 CI, -19.79 to -11.45; 265 participants;  $I^2 = 0\%$ ; Figure 4C). There was an improvement  
16  
17  
18 176 of at least the minimal clinically important difference (MCID;  $\geq 8.9$  points).<sup>18</sup> Because  
19  
20  
21 177 the different measuring tools (Pinto 2010, SNOT-20; Gevaert 2013, Short-Form Health  
22  
23 178 Questionnaire (SF-36)) and unavailable data , these 2 RCTs were excluded in this  
24  
25  
26 179 pooled analysis.

## 27 28 180 **Secondary outcomes**

29  
30  
31 181 Total nasal symptom score (TNSS) was defined as the sum of the scores for nasal  
32  
33  
34 182 congestion score, anterior rhinorrhea score, posterior rhinorrhea score, and sense of  
35  
36  
37 183 smell score, ranging from 0 (no symptoms) to 12 (most severe symptoms).

38  
39 184 The mean difference in the change of TNSS was 1.84 points lower in omalizumab  
40  
41  
42 185 group (MD = -1.84; 95% CI, -2.43 to -1.25; 3 RCTs; 279 participants;  $I^2 = 0\%$ ; Figure  
43  
44  
45 186 4D).

46  
47 187 No serious adverse events (SAEs) were reported in Gevaert 2013 and Pinto 2010.  
48  
49  
50 188 However, POLYP1 2020 reported 1 case in the placebo group with myocardial  
51  
52  
53 189 infarction and POLYP2 2020 reported 1 case of pneumonia in the placebo group and 3  
54  
55  
56 190 cases in the omalizumab group (1 snake bite, 1 hand fracture, and 1 asthma  
57  
58 191 exacerbation). The pooled result indicated that there was no difference in the risk of  
59  
60

1  
2  
3  
4 192 SAEs (risk ratio (RR) = 1.40; 95% CI, 0.29 to 6.80; 4 RCTs; 302 participants;  $I^2 = 28\%$ ;

5  
6  
7 193 Figure 5A).

8  
9 194 There was no difference in the risk of adverse events (AEs) (RR = 0.83; 95% CI, 0.60

10  
11  
12 195 to 1.15; 4 RCTs; 302 participants;  $I^2 = 0\%$ ; Figure 5B). It was uncertain where or not

13  
14  
15 196 there was a difference in the risk of rescue systemic corticosteroid (RSCS; RR = 0.52;

16  
17  
18 197 95% CI, 0.17 to 1.61; 3 RCTs; 279 participants;  $I^2 = 0\%$ ; Figure 5C).

19  
20 198 Reduced need for surgery (RNS) through week 24 was defined as achievement of NPS

21  
22  
23 199 of 4 or lower ( $\leq 2$  for each nostril). POLYP1 2020 and POLYP2 2020 reported the

24  
25  
26 200 number of RNS. The proportion was higher in the group that received omalizumab (RR

27  
28  
29 201 = 5.61; 95% CI, 1.99 to 15.81; 2 RCTs; 265 participants;  $I^2 = 0\%$ ; Figure 5D).

30  
31 202

## 203 **Discussion**

### 204 **Principal findings**

205 This systematic review and meta-analysis identified 4 RCTs with 302 participants  
206 evaluating the efficacy and safety of omalizumab in CRSwNP. It showed that  
207 omalizumab significantly improved the size of nasal polyps (measured by NPS),  
208 symptoms (measured by NCS and TNSS), and Health-related quality of life (HRQoL;  
209 measured by SNOT-22), and reduce the need for surgery (measured by RNS). What's  
210 more, there was no difference in the risk of SAEs, AEs, and RSCS.

### 211 **Comparison with other studies**

212 Hong included two studies (Gavaert 2013 and Pinto 2010) and made a narrative  
213 systematic review<sup>12</sup>. They concluded that there was insufficient evidence to determine  
214 the effectiveness of omalizumab for CRS. In Chong's systematic review and meta-  
215 analysis, there were 3 small studies with 65 participants (Gavaert 2013, Pinto 2010, and  
216 NCT01066104) evaluated omalizumab<sup>13</sup>. Their results also showed that there were very  
217 uncertain about the effect of omalizumab on disease-specific HRQoL, severe adverse  
218 events, the extent of disease (CT scan scores), generic HRQoL, and adverse effects.  
219 NCT01066104<sup>19</sup> included in Chong's review was unpublished data, so it was excluded  
220 in our study according to our inclusion criteria.

### 221 **Implication for future research and clinical practice**

222 Patients with CRSwNP and comorbid asthma often have a high symptom burden,  
223 substantial impact on HRQoL, a higher risk of RSCS and revision surgery<sup>1</sup>. Moreover,

1  
2  
3  
4 224 patients with asthma are more likely to develop CRSwNP than are those without asthma,  
5  
6  
7 225 and they are more likely to receive more oral corticosteroid courses.<sup>20</sup> Therefore, the  
8  
9  
10 226 risk of RSCS may be due to asthma comorbidity.

11  
12 227 There were 4 RCTs included in this systematic review, which recruited patients with  
13  
14  
15 228 moderate to severe CRSwNP. The patients in omalizumab group reduced disease  
16  
17  
18 229 severity and need for surgery, and experienced significant improvements in HRQoL  
19  
20  
21 230 (measured by SNOT-22). Placebo-corrected improvements of SNOT-22 was 15.6  
22  
23  
24 231 points, which exceeded the commonly accepted MCID of 8.9 points.<sup>18, 21</sup> Furthermore,  
25  
26  
27 232 there was no increased risk of SAEs and AEs in patients treated with omalizumab. Thus,  
28  
29  
30 233 it was certain that omalizumab significantly improved endoscopic, clinical, and patient-  
31  
32  
33 234 reported outcomes in moderate to severe CRSwNP and it was well tolerated.

34  
35 235 However, it is still unknown that omalizumab is effective in patients with less severe  
36  
37 236 CRSwNP (such as NPS=1 for each nostril or unilateral nostril) and more affordable  
38  
39  
40 237 compared to conventional treatment with topical and systemic corticosteroids and  
41  
42  
43 238 surgery. Therefore, studies are required to evaluate their effectiveness in patients with  
44  
45  
46 239 less severe diseases and their cost in the treatment. In addition, long-term observational  
47  
48  
49 240 studies are also required to determine if omalizumab lose its effectiveness over time, or  
50  
51  
52 241 whether there are any late adverse events.

### 53 242 **Limitations of the study**

54  
55 243 Despite the strict methodology of this systematic review and meta-analysis using  
56  
57  
58 244 PRISMA guidelines, certain limitations should be considered. First, 4 RCTs were  
59  
60

1  
2  
3  
4 245 recruited from the same group with moderate to severe CRSwNP. Therefore, there is  
5  
6  
7 246 no evidence on whether or not patients with less severe CRSwNP (NPS=1 for each  
8  
9  
10 247 nostril or unilateral nostril) would benefit. Secondly, 4 RCTs were all in adults and no  
11  
12 248 available data for children. Thirdly, because the longest follow-up of 4 RCTs was only  
13  
14  
15 249 up to 26 weeks, there were too short to comprehensively and adequately assess the risks  
16  
17  
18 250 of side effect, RSCS, and RNS. Finally, there were only 4 RCTs (<10), so a possibility  
19  
20  
21 251 of publication bias was not assessed by constructing a funnel plot in this systematic  
22  
23 252 review<sup>17</sup>.

### 253 **Conclusions**

254 To the best of our knowledge, this was the first meta-analysis that identified  
255 omalizumab significantly improved endoscopic, clinical, and patient-reported  
256 outcomes in moderate to severe CRSwNP and it was safe and well-tolerated. Studies  
257 are required to evaluate their effectiveness in patients with less severe diseases and their  
258 cost in the treatment.

### 259 **Acknowledgements**

260 N/A.

### 261 **Contributors**

262 Concept and design: R Zheng and Q.T Yang. Acquisition, analysis, or interpretation of  
263 data: Q.W Wu, L.X Yuan, H.J Qiu, X.Y Wang, and X.K Huang. Drafting of the  
264 manuscript: Q.W Wu and L.X Yuan. Critical revision of the manuscript for important

1  
2  
3  
4 265 intellectual content: R Zheng and Q.T Yang. Statistical analysis: L.X Yuan. Supervision:  
5  
6  
7 266 R Zheng and Q.T Yang.  
8  
9

10 267 **Funding**  
11  
12

13  
14 268 This work was supported by the National Natural Science Foundation of China (No.  
15  
16 269 U20A20399 and 81870704), the Key-area Research and Development Program of  
17  
18  
19 270 Guangdong Province (No.2020B0101130015), Sun Yat-sen University Clinical  
20  
21  
22 271 Research 5010 Program (No. 2019006), the China Postdoctoral Science Foundation  
23  
24 272 Grant (2019M653207), Guangdong Basic and Applied Basic Research Foundation  
25  
26  
27 273 (2020A1515010133), and the Medical Scientific Research Foundation of Guangdong  
28  
29  
30 274 Province of China (A2019037).  
31  
32

33 275 **Competing interests**  
34  
35

36  
37 276 No potential conflict of interest was reported by the authors.  
38  
39

40 277 **Patient consent for publication**  
41  
42

43  
44 278 Not required.  
45  
46

47 279 **Patient and public involvement**  
48  
49

50  
51 280 No patients were involved in the development of the research question, selection of the  
52  
53  
54 281 outcome measures, design and implementation of the study, or interpretation of the  
55  
56  
57 282 results.  
58  
59  
60

1  
2  
3  
4 283 **Provenance and peer review**

5  
6  
7 284 Not commissioned; externally peer reviewed.  
8  
9

10  
11 285 **Data availability statement**

12  
13  
14 286 All data relevant to the study are included in the article or uploaded as supplementary  
15  
16  
17 287 information.  
18  
19

20  
21 288 **ORCID**

22  
23  
24 289 Qingwu Wu, <https://orcid.org/0000-0003-0943-2558>.

25  
26  
27 290 Qintai Yang, <https://orcid.org/0000-0003-3377-737X>.  
28  
29

30  
31 291 **Ethics approval**

32  
33  
34 292 It was not required.  
35  
36  
37  
38  
39  
40  
41  
42  
43  
44  
45  
46  
47  
48  
49  
50  
51  
52  
53  
54  
55  
56  
57  
58  
59  
60



294 **References**

- 295 1. Fokkens WJ, Lund VJ, Hopkins C, et al. European Position Paper on Rhinosinusitis  
296 and Nasal Polyps 2020. *Rhinology* 2020; 58. DOI: 10.4193/Rhin20.600.
- 297 2. Benjamin MR, Stevens WW, Li N, et al. Clinical Characteristics of Patients with  
298 Chronic Rhinosinusitis without Nasal Polyps in an Academic Setting. *J Allergy Clin*  
299 *Immunol Pract* 2019; 7: 1010-1016. DOI: 10.1016/j.jaip.2018.10.014.
- 300 3. Bachert C, Zhang L and Gevaert P. Current and future treatment options for adult  
301 chronic rhinosinusitis: Focus on nasal polyposis. *The Journal of allergy and clinical*  
302 *immunology* 2015; 136: 1431-1440. DOI: 10.1016/j.jaci.2015.10.010.
- 303 4. Khan A, Huynh TMT, Vandeplas G, et al. The GALEN rhinosinusitis cohort:  
304 chronic rhinosinusitis with nasal polyps affects health-related quality of life. *Rhinology*  
305 2019; 57: 343-351. DOI: 10.4193/Rhin19.158.
- 306 5. Rudmik L. Economics of Chronic Rhinosinusitis. *Curr Allergy Asthma Rep* 2017;  
307 17: 20. DOI: 10.1007/s11882-017-0690-5.
- 308 6. Stevens WW, Schleimer RP and Kern RC. Chronic Rhinosinusitis with Nasal  
309 Polyps. *J Allergy Clin Immunol Pract* 2016; 4: 565-572. DOI:  
310 10.1016/j.jaip.2016.04.012.
- 311 7. Tokunaga T, Sakashita M, Haruna T, et al. Novel scoring system and algorithm for  
312 classifying chronic rhinosinusitis: the JESREC Study. *Allergy* 2015; 70. DOI:  
313 10.1111/all.12644.
- 314 8. DeConde AS, Mace JC, Levy JM, et al. Prevalence of polyp recurrence after  
315 endoscopic sinus surgery for chronic rhinosinusitis with nasal polyposis. *Laryngoscope*  
316 2017; 127: 550-555. DOI: 10.1002/lary.26391.
- 317 9. Calus L, Van Bruaene N, Bosteels C, et al. Twelve-year follow-up study after  
318 endoscopic sinus surgery in patients with chronic rhinosinusitis with nasal polyposis.  
319 *Clin Transl Allergy* 2019; 9: 30. DOI: 10.1186/s13601-019-0269-4.
- 320 10. Pinto JM, Mehta N, DeTineo M, et al. A randomized, double-blind, placebo-  
321 controlled trial of anti-IgE for chronic rhinosinusitis. *Rhinology* 2010; 48: 318-324.  
322 DOI: 10.4193/Rhin09.144.
- 323 11. Gevaert P, Calus L, Van Zele T, et al. Omalizumab is effective in allergic and  
324 nonallergic patients with nasal polyps and asthma. *J Allergy Clin Immunol* 2013; 131:  
325 110-116.e111. 2012/10/02. DOI: 10.1016/j.jaci.2012.07.047.
- 326 12. Hong CJ, Tsang AC, Quinn JG, et al. Anti-IgE monoclonal antibody therapy for  
327 the treatment of chronic rhinosinusitis: a systematic review. *Syst Rev* 2015; 4: 166. DOI:  
328 10.1186/s13643-015-0157-5.
- 329 13. Chong L-Y, Piroomchai P, Sharp S, et al. Biologics for chronic rhinosinusitis.  
330 *Cochrane Database Syst Rev* 2020; 2: CD013513. DOI:  
331 10.1002/14651858.CD013513.pub2.
- 332 14. Gevaert P, Omachi TA, Corren J, et al. Efficacy and safety of omalizumab in nasal  
333 polyposis: two randomized phase III trials. *Journal of allergy and clinical immunology*  
334 2020. Journal Article.
- 335 15. Qingwu Wu, Rui Zheng, Huijun Qiu, et al. Anti-IgE monoclonal antibody in the

- 1  
2  
3 336 treatment of chronic rhinosinusitis with nasal polyps. PROSPERO 2020  
4 337 CRD42020207639 Available from:  
5 338 [https://www.crd.york.ac.uk/prospero/display\\_record.php?ID=CRD42020207639](https://www.crd.york.ac.uk/prospero/display_record.php?ID=CRD42020207639).  
6  
7 339 16. Moher D, Liberati A, Tetzlaff J, et al. Preferred reporting items for systematic  
8 340 reviews and meta-analyses: the PRISMA statement. *Ann Intern Med* 2009; 151.  
9  
10 341 17. Higgins JPT, Green S (editors). *Cochrane Handbook for Systematic Reviews of*  
11 342 *Interventions* Version 5.1.0 [updated March 2011]. The Cochrane Collaboration, 2011.  
12 343 Available from [www.cochrane-handbook.org](http://www.cochrane-handbook.org).  
13  
14 344 18. Chowdhury NI, Mace JC, Bodner TE, et al. Investigating the minimal clinically  
15 345 important difference for SNOT-22 symptom domains in surgically managed chronic  
16 346 rhinosinusitis. *Int Forum Allergy Rhinol* 2017; 7: 1149-1155. 2017/10/21. DOI:  
17 347 10.1002/alr.22028.  
18  
19 348 19. NCT01066104. Subcutaneous omalizumab for treatment of chronic rhinosinusitis  
20 349 with nasal polyposis. [https:// clinicaltrials.gov/show/nct01066104](https://clinicaltrials.gov/show/nct01066104) 2009. [CRS:  
21 350 1647960].  
22  
23 351 20. John Staniorski C, Price CPE, Weibman AR, et al. Asthma onset pattern and patient  
24 352 outcomes in a chronic rhinosinusitis population. *International forum of allergy &*  
25 353 *rhinology* 2018; 8: 495-503. DOI: 10.1002/alr.22064.  
26  
27 354 21. Hopkins C, Gillett S, Slack R, et al. Psychometric validity of the 22-item Sinonasal  
28 355 Outcome Test. *Clin Otolaryngol* 2009; 34: 447-454. DOI: 10.1111/j.1749-  
29 356 4486.2009.01995.x.  
30  
31 357  
32  
33  
34  
35  
36  
37  
38  
39  
40  
41  
42  
43  
44  
45  
46  
47  
48  
49  
50  
51  
52  
53  
54  
55  
56  
57  
58  
59  
60

1  
2  
3  
4 358 **Figure 1.** PRISMA flow diagram of the literature search.

5  
6  
7 359 **Figure 2.** ‘Risk of bias’ graph: review authors’ judgements about each risk of bias item  
8  
9 360 presented as percentages across all included studies.

10  
11  
12 361 **Figure 3.** ‘Risk of bias’ summary: review authors’ judgements about each risk of bias  
13  
14  
15 362 item for each included study.

16  
17 363 **Figure 4.** Meta-analyses of omalizumab versus placebo, comparing efficacy and safety.  
18  
19  
20 364 Outcomes assessed are: (A) Nasal polyps score (NPS), (B) Nasal congestion score  
21  
22  
23 365 (NCS), (C) Sino-Nasal Outcome Test-22 (SNOT-22), and (D) Total nasal symptom  
24  
25  
26 366 score (TNSS).

27  
28 367 **Figure 5.** Meta-analyses of omalizumab versus placebo, comparing efficacy and safety.  
29  
30  
31 368 Outcomes assessed are: (A) Serious adverse events (SAEs), (B) Adverse events (AEs),  
32  
33  
34 369 (C) Rescue systemic corticosteroid (RSCS), and (D) Reduced need for surgery (RNS).  
35  
36  
37  
38  
39  
40  
41  
42  
43  
44  
45  
46  
47  
48  
49  
50  
51  
52  
53  
54  
55  
56  
57  
58  
59  
60

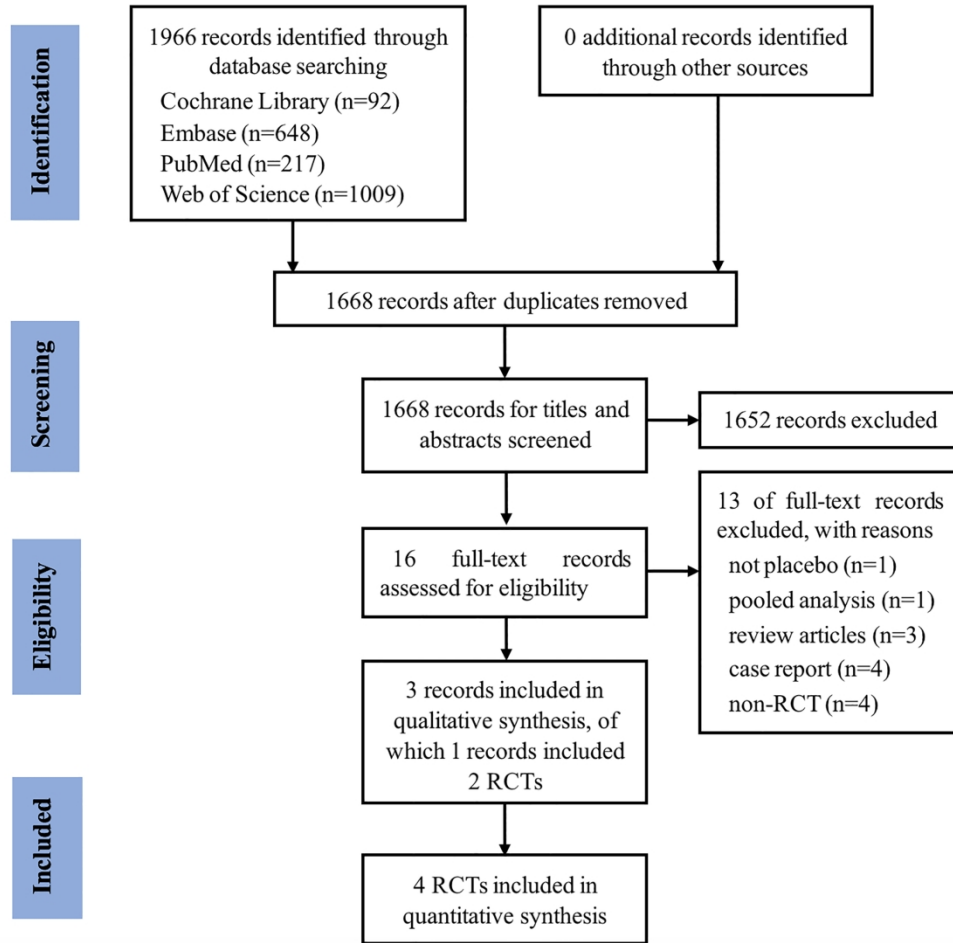

Figure 1. PRISMA flow diagram of the literature search.

231x220mm (300 x 300 DPI)

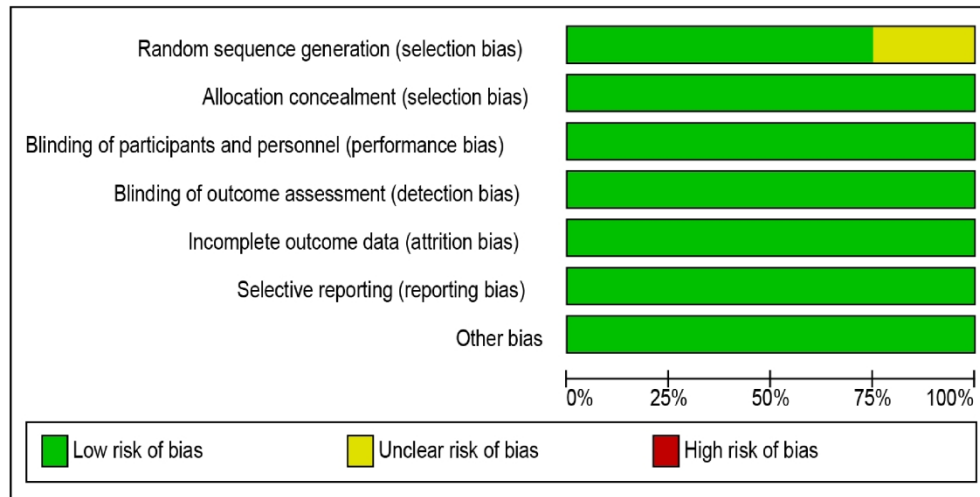

Figure 2. 'Risk of bias' graph: review authors' judgements about each risk of bias item presented as percentages across all included studies.

209x107mm (300 x 300 DPI)

1  
2  
3  
4  
5  
6  
7  
8  
9  
10  
11  
12  
13  
14  
15  
16  
17  
18  
19  
20  
21  
22  
23  
24  
25  
26  
27  
28  
29  
30  
31  
32  
33  
34  
35  
36  
37  
38  
39  
40  
41  
42  
43  
44  
45  
46  
47  
48  
49  
50  
51  
52  
53  
54  
55  
56  
57  
58  
59  
60

|              | Random sequence generation (selection bias) | Allocation concealment (selection bias) | Blinding of participants and personnel (performance bias) | Blinding of outcome assessment (detection bias) | Incomplete outcome data (attrition bias) | Selective reporting (reporting bias) | Other bias |
|--------------|---------------------------------------------|-----------------------------------------|-----------------------------------------------------------|-------------------------------------------------|------------------------------------------|--------------------------------------|------------|
| Gevaert 2013 | +                                           | +                                       | +                                                         | +                                               | +                                        | +                                    | +          |
| Pinto 2010   | ?                                           | +                                       | +                                                         | +                                               | +                                        | +                                    | +          |
| POLYP1 2020  | +                                           | +                                       | +                                                         | +                                               | +                                        | +                                    | +          |
| POLYP2 2020  | +                                           | +                                       | +                                                         | +                                               | +                                        | +                                    | +          |

Figure 3. 'Risk of bias' summary: review authors' judgements about each risk of bias item for each included study.

107x204mm (300 x 300 DPI)



Figure 4. Meta-analyses of omalizumab versus placebo, comparing efficacy and safety. Outcomes assessed are: (A) Nasal polyps score (NPS), (B) Nasal congestion score (NCS), (C) Sino-Nasal Outcome Test-22 (SNOT-22), and (D) Total nasal symptom score (TNSS).

244x184mm (300 x 300 DPI)

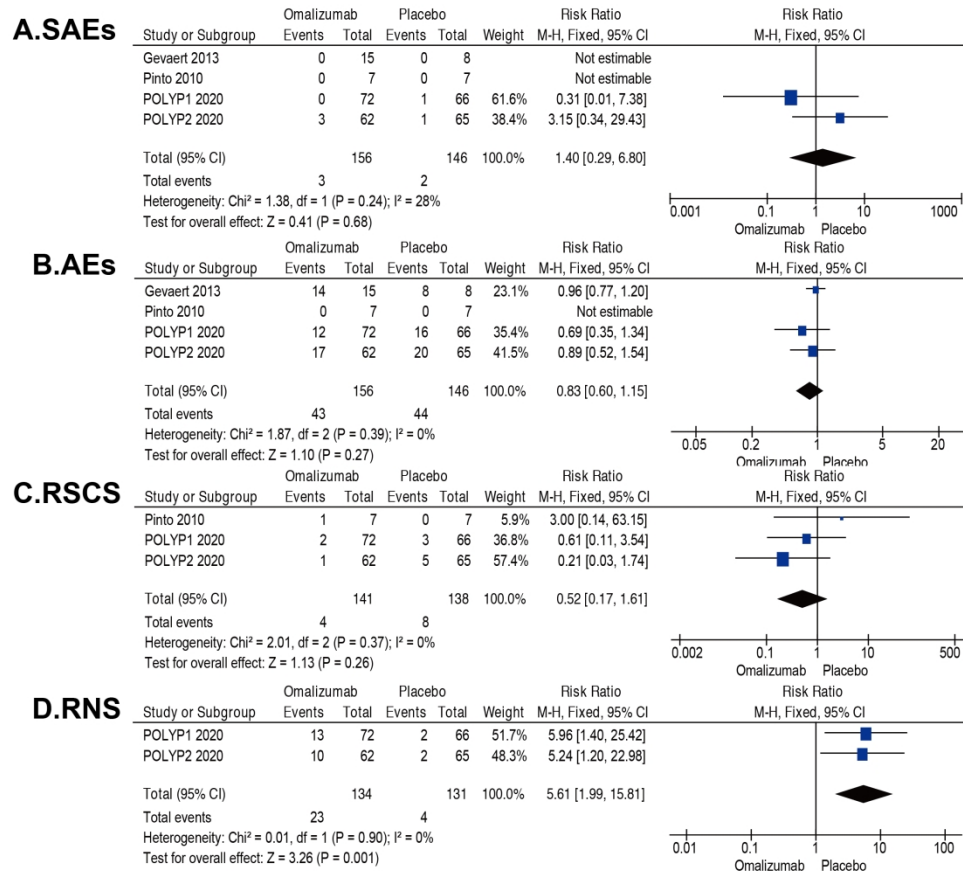

Figure 5. Meta-analyses of omalizumab versus placebo, comparing efficacy and safety. Outcomes assessed are: (A) Serious adverse events (SAEs), (B) Adverse events (AEs), (C) Rescue systemic corticosteroid (RSCS), and (D) Reduced need for surgery (RNS).

220x203mm (300 x 300 DPI)



**Appendix. Search strategies**

| <b>PubMed</b>                                                                                                                                                                                                                                                     |
|-------------------------------------------------------------------------------------------------------------------------------------------------------------------------------------------------------------------------------------------------------------------|
| 1. nasal polyps[MeSH Terms]                                                                                                                                                                                                                                       |
| 2. (((nasal polyp*[Title/Abstract]) OR (nasal papilloma[Title/Abstract])) OR (nose polyp*[Title/Abstract])) OR (nasi papilloma[Title/Abstract]) OR (nasi polyposis[Title/Abstract])                                                                               |
| 3. #1 OR #2                                                                                                                                                                                                                                                       |
| 4. sinusitis[MeSH Terms]                                                                                                                                                                                                                                          |
| 5. ((((((chronic rhinosinusitis[Title/Abstract]) OR (rhinopolyp*[Title/Abstract])) OR (CRSwNP[Title/Abstract])) OR (sinus Infection*[Title/Abstract])) OR (rhinitis[Title/Abstract])) OR (pansinusitis[Title/Abstract]) OR (sphenoid* sinusitis[Title/Abstract])) |
| 6. #4 OR #5                                                                                                                                                                                                                                                       |
| 7. omalizumab[MeSH Terms]                                                                                                                                                                                                                                         |
| 8. (((Xolair[Title/Abstract]) OR (anti-IgE antibody[Title/Abstract])) OR (anti-IgE monoclonal antibody[Title/Abstract])) OR (anti-IgE mAb[Title/Abstract])                                                                                                        |
| 9. #7 OR #8                                                                                                                                                                                                                                                       |
| 10. #3 OR #6                                                                                                                                                                                                                                                      |
| 11. #9 AND #10                                                                                                                                                                                                                                                    |
| <b>Cochrane Library</b>                                                                                                                                                                                                                                           |
| 1. MeSH descriptor: [Nasal Polyps] explode all trees                                                                                                                                                                                                              |
| 2. (nasal polyp*):ti,ab,kw OR (nasal papilloma):ti,ab,kw OR (nose polyp*):ti,ab,kw OR (nasi papilloma):ti,ab,kw OR (nasi polyposis):ti,ab,kw (Word variations have been searched)                                                                                 |
| 3. #1 OR #2                                                                                                                                                                                                                                                       |
| 4. MeSH descriptor: [Sinusitis] explode all trees                                                                                                                                                                                                                 |
| 5. (chronic rhinosinusitis):ti,ab,kw OR (rhinopolyp*):ti,ab,kw OR (CRSwNP):ti,ab,kw OR (sinus infection*):ti,ab,kw OR (rhinitis):ti,ab,kw (Word variations have been searched)                                                                                    |
| 6. #4 OR #5                                                                                                                                                                                                                                                       |
| 7. (pansinusitis):ti,ab,kw OR (sphenoid* sinusitis):ti,ab,kw (Word variations have been searched)                                                                                                                                                                 |
| 8. #6 OR #7                                                                                                                                                                                                                                                       |
| 9. MeSH descriptor: [Omalizumab] explode all trees                                                                                                                                                                                                                |
| 10. (Xolair):ti,ab,kw OR (anti-IgE antibody):ti,ab,kw OR (anti-IgE monoclonal antibody):ti,ab,kw OR (anti-IgE mAb):ti,ab,kw (Word variations have been searched)                                                                                                  |
| 11. #9 OR #10                                                                                                                                                                                                                                                     |
| 12. #3 OR #8                                                                                                                                                                                                                                                      |
| 13. #11 AND #12                                                                                                                                                                                                                                                   |
| <b>Embase</b>                                                                                                                                                                                                                                                     |
| 1. 'nose polyp'/exp                                                                                                                                                                                                                                               |
| 2. 'nasal polyp*' OR 'nasal papilloma'/exp OR 'nasal papilloma' OR 'nose polyp*' OR                                                                                                                                                                               |

1  
2  
3 'nasi papilloma' OR 'nasi polyposis':ab,ti  
4 3. #1 OR #2  
5 4. 'sinusitis'/exp  
6 5. 'chronic rhinosinusitis rhinopolyp\*' OR crswnp OR 'sinus infection\*' OR rhinitis  
7 OR pansinusitis OR 'sphenoid\* sinusitis':ab,ti  
8 6. #4 OR #5  
9 7. #3 OR #6  
10 8. 'omalizumab'/exp  
11 9. 'xolair' OR 'anti-ige antibody' OR 'anti-ige monoclonal antibody' OR 'anti-ige  
12 mab':ab,ti  
13 10. #8 OR #9  
14 11. #7 AND #10  
15 12. #7 AND #10 AND [medline]/lim  
16 13. #11 NOT #12  
17  
18  
19  
20  
21

### Web of Science

22  
23 1. TOPIC: (nasal polyp\*) OR TOPIC: (nasal papilloma) OR TOPIC: (nose polyp\*)  
24 OR TOPIC: (nasi papilloma) OR TOPIC: (nasi polyposis)  
25 2. TOPIC: (sinusitis) OR TOPIC: (chronic rhinosinusitis) OR TOPIC: (rhinopolyp\*)  
26 OR TOPIC: (CRSwNP) OR TOPIC: (sinus Infection\*) OR TOPIC: (rhinitis) OR  
27 TOPIC: (pansinusitis) OR TOPIC: (sphenoid\* sinusitis)  
28 3. #1 OR #2  
29 4. TOPIC: (omalizumab) OR TOPIC: (Xolair) OR TOPIC: (anti-IgE antibody) OR  
30 TOPIC: (anti-IgE monoclonal antibody) OR TOPIC: (anti-IgE mAb)  
31 5. #3 AND #4  
32  
33  
34  
35  
36  
37  
38  
39  
40  
41  
42  
43  
44  
45  
46  
47  
48  
49  
50  
51  
52  
53  
54  
55  
56  
57  
58  
59  
60



# PRISMA 2009 Checklist

| Section/topic                      | #  | Checklist item                                                                                                                                                                                                                                                                                              | Reported on page # |
|------------------------------------|----|-------------------------------------------------------------------------------------------------------------------------------------------------------------------------------------------------------------------------------------------------------------------------------------------------------------|--------------------|
| <b>TITLE</b>                       |    |                                                                                                                                                                                                                                                                                                             |                    |
| Title                              | 1  | Identify the report as a systematic review, meta-analysis, or both.                                                                                                                                                                                                                                         | 1                  |
| <b>ABSTRACT</b>                    |    |                                                                                                                                                                                                                                                                                                             |                    |
| Structured summary                 | 2  | Provide a structured summary including, as applicable: background; objectives; data sources; study eligibility criteria, participants, and interventions; study appraisal and synthesis methods; results; limitations; conclusions and implications of key findings; systematic review registration number. | 2-3                |
| <b>INTRODUCTION</b>                |    |                                                                                                                                                                                                                                                                                                             |                    |
| Rationale                          | 3  | Describe the rationale for the review in the context of what is already known.                                                                                                                                                                                                                              | 4                  |
| Objectives                         | 4  | Provide an explicit statement of questions being addressed with reference to participants, interventions, comparisons, outcomes, and study design (PICOS).                                                                                                                                                  | 4                  |
| <b>METHODS</b>                     |    |                                                                                                                                                                                                                                                                                                             |                    |
| Protocol and registration          | 5  | Indicate if a review protocol exists, if and where it can be accessed (e.g., Web address), and, if available, provide registration information including registration number.                                                                                                                               | 5                  |
| Eligibility criteria               | 6  | Specify study characteristics (e.g., PICOS, length of follow-up) and report characteristics (e.g., years considered, language, publication status) used as criteria for eligibility, giving rationale.                                                                                                      | 5                  |
| Information sources                | 7  | Describe all information sources (e.g., databases with dates of coverage, contact with study authors to identify additional studies) in the search and date last searched.                                                                                                                                  | 5                  |
| Search                             | 8  | Present full electronic search strategy for at least one database, including any limits used, such that it could be repeated.                                                                                                                                                                               | 5                  |
| Study selection                    | 9  | State the process for selecting studies (i.e., screening, eligibility, included in systematic review, and, if applicable, included in the meta-analysis).                                                                                                                                                   | 5                  |
| Data collection process            | 10 | Describe method of data extraction from reports (e.g., piloted forms, independently, in duplicate) and any processes for obtaining and confirming data from investigators.                                                                                                                                  | 5-6                |
| Data items                         | 11 | List and define all variables for which data were sought (e.g., PICOS, funding sources) and any assumptions and simplifications made.                                                                                                                                                                       | 6                  |
| Risk of bias in individual studies | 12 | Describe methods used for assessing risk of bias of individual studies (including specification of whether this was done at the study or outcome level), and how this information is to be used in any data synthesis.                                                                                      | 6                  |
| Summary measures                   | 13 | State the principal summary measures (e.g., risk ratio, difference in means).                                                                                                                                                                                                                               | 6-7                |
| Synthesis of results               | 14 | Describe the methods of handling data and combining results of studies, if done, including measures of consistency (e.g., $I^2$ ) for each meta-analysis.                                                                                                                                                   | 6-7                |



# PRISMA 2009 Checklist

Page 1 of 2

| Section/topic                 | #  | Checklist item                                                                                                                                                                                           | Reported on page #     |
|-------------------------------|----|----------------------------------------------------------------------------------------------------------------------------------------------------------------------------------------------------------|------------------------|
| Risk of bias across studies   | 15 | Specify any assessment of risk of bias that may affect the cumulative evidence (e.g., publication bias, selective reporting within studies).                                                             | n/a                    |
| Additional analyses           | 16 | Describe methods of additional analyses (e.g., sensitivity or subgroup analyses, meta-regression), if done, indicating which were pre-specified.                                                         | n/a                    |
| <b>RESULTS</b>                |    |                                                                                                                                                                                                          |                        |
| Study selection               | 17 | Give numbers of studies screened, assessed for eligibility, and included in the review, with reasons for exclusions at each stage, ideally with a flow diagram.                                          | 8, Figure 1            |
| Study characteristics         | 18 | For each study, present characteristics for which data were extracted (e.g., study size, PICOS, follow-up period) and provide the citations.                                                             | 8, Table 1             |
| Risk of bias within studies   | 19 | Present data on risk of bias of each study and, if available, any outcome level assessment (see item 12).                                                                                                | 10; Figure 2 and 3     |
| Results of individual studies | 20 | For all outcomes considered (benefits or harms), present, for each study: (a) simple summary data for each intervention group (b) effect estimates and confidence intervals, ideally with a forest plot. | 11-12; Figure 4 and 5  |
| Synthesis of results          | 21 | Present results of each meta-analysis done, including confidence intervals and measures of consistency.                                                                                                  | 11-12; Figure 4 and 5. |
| Risk of bias across studies   | 22 | Present results of any assessment of risk of bias across studies (see Item 15).                                                                                                                          | n/a                    |
| Additional analysis           | 23 | Give results of additional analyses, if done (e.g., sensitivity or subgroup analyses, meta-regression [see Item 16]).                                                                                    | n/a                    |
| <b>DISCUSSION</b>             |    |                                                                                                                                                                                                          |                        |
| Summary of evidence           | 24 | Summarize the main findings including the strength of evidence for each main outcome; consider their relevance to key groups (e.g., healthcare providers, users, and policy makers).                     | 13-14                  |
| Limitations                   | 25 | Discuss limitations at study and outcome level (e.g., risk of bias), and at review-level (e.g., incomplete retrieval of identified research, reporting bias).                                            | 14-15                  |
| Conclusions                   | 26 | Provide a general interpretation of the results in the context of other evidence, and implications for future research.                                                                                  | 15                     |
| <b>FUNDING</b>                |    |                                                                                                                                                                                                          |                        |



# PRISMA 2009 Checklist

1  
2  
3  
4  
5  
6  
7  
8  
9  
10  
11  
12  
13  
14  
15  
16  
17  
18  
19  
20  
21  
22  
23  
24  
25  
26  
27  
28  
29  
30  
31  
32  
33  
34  
35  
36  
37  
38  
39  
40  
41  
42  
43  
44  
45  
46  
47

|         |    |                                                                                                                                            |    |
|---------|----|--------------------------------------------------------------------------------------------------------------------------------------------|----|
| Funding | 27 | Describe sources of funding for the systematic review and other support (e.g., supply of data); role of funders for the systematic review. | 16 |
|---------|----|--------------------------------------------------------------------------------------------------------------------------------------------|----|

From: Moher D, Liberati A, Tetzlaff J, Altman DG, The PRISMA Group (2009). Preferred Reporting Items for Systematic Reviews and Meta-Analyses: The PRISMA Statement. PLoS Med 6(6): e1000097. doi:10.1371/journal.pmed1000097

For more information, visit: [www.prisma-statement.org](http://www.prisma-statement.org).

Page 2 of 2

For peer review only
