# Supplementary material for: Efficacy and safety of omalizumab in chronic rhinosinusitis with nasal polyps: a systematic review and meta-analysis of randomised controlled trials
Source: PubMed Central journal article supplement — BMJ Open. 2021 Sep 3;11(9):e047344. doi: 10.1136/bmjopen-2020-047344 (PMC8420736; doi:10.1136/bmjopen-2020-047344), 2021-09-03
Supplement: bmjopen-2020-047344supp001.pdf [file bmjopen-2020-047344supp001.pdf]

**Appendix.** Search strategies

| <b>PubMed</b>                                                                                                                                                                                                                                                                                                                                                                                                                                                                                                                                                                                                                                                                                                                                                                                                                                                                                                                                                                                                                              |
|--------------------------------------------------------------------------------------------------------------------------------------------------------------------------------------------------------------------------------------------------------------------------------------------------------------------------------------------------------------------------------------------------------------------------------------------------------------------------------------------------------------------------------------------------------------------------------------------------------------------------------------------------------------------------------------------------------------------------------------------------------------------------------------------------------------------------------------------------------------------------------------------------------------------------------------------------------------------------------------------------------------------------------------------|
| <ol style="list-style-type: none"> <li>1. nasal polyps[MeSH Terms]</li> <li>2. (((((nasal polyp*[Title/Abstract]) OR (nasal papilloma[Title/Abstract])) OR (nose polyp*[Title/Abstract])) OR (nasi papilloma[Title/Abstract])) OR (nasi polyposis[Title/Abstract]))</li> <li>3. #1 OR #2</li> <li>4. sinusitis[MeSH Terms]</li> <li>5. ((((((chronic rhinosinusitis[Title/Abstract]) OR (rhinopolyp*[Title/Abstract])) OR (CRSwNP[Title/Abstract])) OR (sinus Infection*[Title/Abstract])) OR (rhinitis[Title/Abstract])) OR (pansinusitis[Title/Abstract])) OR (sphenoid* sinusitis[Title/Abstract]))</li> <li>6. #4 OR #5</li> <li>7. omalizumab[MeSH Terms]</li> <li>8. (((Xolair[Title/Abstract]) OR (anti-IgE antibody[Title/Abstract])) OR (anti-IgE monoclonal antibody[Title/Abstract])) OR (anti-IgE mAb[Title/Abstract])</li> <li>9. #7 OR #8</li> <li>10. #3 OR #6</li> <li>11. #9 AND #10</li> </ol>                                                                                                                           |
| <b>Cochrane Library</b>                                                                                                                                                                                                                                                                                                                                                                                                                                                                                                                                                                                                                                                                                                                                                                                                                                                                                                                                                                                                                    |
| <ol style="list-style-type: none"> <li>1. MeSH descriptor: [Nasal Polyps] explode all trees</li> <li>2. (nasal polyp*):ti,ab,kw OR (nasal papilloma):ti,ab,kw OR (nose polyp*):ti,ab,kw OR (nasi papilloma):ti,ab,kw OR (nasi polyposis):ti,ab,kw (Word variations have been searched)</li> <li>3. #1 OR #2</li> <li>4. MeSH descriptor: [Sinusitis] explode all trees</li> <li>5. (chronic rhinosinusitis):ti,ab,kw OR (rhinopolyp*):ti,ab,kw OR (CRSwNP):ti,ab,kw OR (sinus infection*):ti,ab,kw OR (rhinitis):ti,ab,kw (Word variations have been searched)</li> <li>6. #4 OR #5</li> <li>7. (pansinusitis):ti,ab,kw OR (sphenoid* sinusitis):ti,ab,kw (Word variations have been searched)</li> <li>8. #6 OR #7</li> <li>9. MeSH descriptor: [Omalizumab] explode all trees</li> <li>10. (Xolair):ti,ab,kw OR (anti-IgE antibody):ti,ab,kw OR (anti-IgE monoclonal antibody):ti,ab,kw OR (anti-IgE mAb):ti,ab,kw (Word variations have been searched)</li> <li>11. #9 OR #10</li> <li>12. #3 OR #8</li> <li>13. #11 AND #12</li> </ol> |
| <b>Embase</b>                                                                                                                                                                                                                                                                                                                                                                                                                                                                                                                                                                                                                                                                                                                                                                                                                                                                                                                                                                                                                              |
| <ol style="list-style-type: none"> <li>1. 'nose polyp'/exp</li> <li>2. 'nasal polyp*' OR 'nasal papilloma'/exp OR 'nasal papilloma' OR 'nose polyp*' OR</li> </ol>                                                                                                                                                                                                                                                                                                                                                                                                                                                                                                                                                                                                                                                                                                                                                                                                                                                                         |

|                                                                                                                                                                                                                                                                                                                                                                                                                                                                                                                                             |
|---------------------------------------------------------------------------------------------------------------------------------------------------------------------------------------------------------------------------------------------------------------------------------------------------------------------------------------------------------------------------------------------------------------------------------------------------------------------------------------------------------------------------------------------|
| <p>'nasi papilloma' OR 'nasi polyposis':ab,ti<br/>3. #1 OR #2<br/>4. 'sinusitis'/exp<br/>5. 'chronic rhinosinusitis rhinopolyp*' OR crswnp OR 'sinus infection*' OR rhinitis OR pansinusitis OR 'sphenoid* sinusitis':ab,ti<br/>6. #4 OR #5<br/>7. #3 OR #6<br/>8. 'omalizumab'/exp<br/>9. 'xolair' OR 'anti-ige antibody' OR 'anti-ige monoclonal antibody' OR 'anti-ige mab':ab,ti<br/>10. #8 OR #9<br/>11. #7 AND #10<br/>12. #7 AND #10 AND [medline]/lim<br/>13. #11 NOT #12</p>                                                       |
| <b>Web of Science</b>                                                                                                                                                                                                                                                                                                                                                                                                                                                                                                                       |
| <p>1. TOPIC: (nasal polyp*) OR TOPIC: (nasal papilloma) OR TOPIC: (nose polyp*) OR TOPIC: (nasi papilloma) OR TOPIC: (nasi polyposis)<br/>2. TOPIC: (sinusitis) OR TOPIC: (chronic rhinosinusitis) OR TOPIC: (rhinopolyp*) OR TOPIC: (CRSwNP) OR TOPIC: (sinus Infection*) OR TOPIC: (rhinitis) OR TOPIC: (pansinusitis) OR TOPIC: (sphenoid* sinusitis)<br/>3. #1 OR #2<br/>4. TOPIC: (omalizumab) OR TOPIC: (Xolair) OR TOPIC: (anti-IgE antibody) OR TOPIC: (anti-IgE monoclonal antibody) OR TOPIC: (anti-IgE mAb)<br/>5. #3 AND #4</p> |
